1 Mapping of Quantitative Trait Loci for Traits linked to Fusarium Head Blight Symptoms  
2 Evaluation In Barley RILs

3  
4  
5 Piotr Ogrodowicz<sup>1</sup>, Anetta Kuczyńska<sup>1,\*</sup>, Krzysztof Mikołajczak<sup>1</sup>, Tadeusz Adamski<sup>1</sup>, Maria Surma<sup>1</sup>, Paweł  
6 Krajewski<sup>1</sup>, Hanna Ćwiek-Kupczyńska<sup>1</sup>, Michał Kempa<sup>1</sup>, Michał Rokicki<sup>2</sup>, Dorota Jasińska<sup>2</sup>

7 <sup>1</sup> Institute of Plant Genetics, Academy of Sciences, Strzeszyńska Str. 34, 60-479 Poznań, Poland

8 <sup>2</sup> Poznań Plant Breeding Station, Kasztanowa 5, 63-004 Tulec, Poland

9 \*Corresponding author:

10 Tel.: (+48 61) 65 50 232; e-mail: [akuc@igr.poznan.pl](mailto:akuc@igr.poznan.pl)

11  
12  
13 **Abstract:** Fusarium head blight (FHB) is a devastating disease in small grain cereals worldwide.  
14 The disease results in the reduction of grain yield and affects its quality. In addition, mycotoxins  
15 accumulated in grain are harmful to both humans and animals. It has been reported that response  
16 to pathogen infection may be associated with the morphological and developmental characteristics  
17 of the host plant, e.g. the earliness and plant height. Despite the many studies the effective markers  
18 for the selection of barley genotypes with increased resistance to FHB have not thus far been  
19 developed. Therefore, exploring the genetic relationship between agronomic traits (e.g. heading  
20 date or stem height) and disease resistance is of importance to the understanding of plant resistance  
21 via “disease escape” or dwarf stature. The studied plant material consisted of 100 recombinant  
22 inbred lines (RIL) of spring barley. Plants were examined in field conditions (three locations) in a  
23 completely randomized design with three replications. Barley genotypes were artificially infected  
24 with spores of *Fusarium* before heading. Apart from the main phenotypic traits (plant height, spike  
25 characteristic, grain yield) the infected kernels were visually scored and the content of  
26 deoxynivalenol (DON) mycotoxin was investigated. A set of 70 Quantitative Trait Loci (QTLs)  
27 were detected through phenotyping of the mapping population in field condition and genotyping  
28 using a barley Illumina iSelect platform with 9K markers. Six loci were detected for FHB index on  
29 chromosomes 2H, 3H, 5H and 7H. The region on the short arm of the 2H chromosome was

30 detected in the current study, in which many QTLs associated with FHB- and yield-related  
31 characters were found. This study confirms that agromorphological traits are tightly related to the  
32 FHB and should be taken into consideration when breeding barley plants for FHB resistance.

33

## 34 **Introduction**

35

36 Fusarium head blight (FHB) or a scabs affects different species of crops around the world. The  
37 infection is caused by several fungal pathogens, among others *Fusarium culmorum* (W. G. Sm.)  
38 *Sacc* and *Fusarium graminearum* (teleomorph stage: *Gibberella zeae*). The first species of  
39 *Fusarium* has been found to dominate in regions with warm and humid conditions, whereas the  
40 second has been associated with cool, wet and humid conditions [1]. The visible symptoms of the  
41 disease are bleaching of some of the florets in the head before maturity stage. Other symptoms  
42 include tan to brown discoloration at the base of the spike and a pink or orange colored mold at  
43 the base of the florets under moist conditions. Kernels observed on the infected spikes are  
44 shriveled, white, and chalky in appearance. Moreover, *Fusarium* spp. produce trichothecene -  
45 deoxynivalenol (DON) [2]. This mycotoxin disrupts normal cell function by inhibiting protein  
46 synthesis [3] which can result in reducing grain quality and yield performance. Floret sterility and  
47 deformed kernels contribute to significant yield loss [4]. In Europe 15 – 55% of the barley products  
48 are contaminated with DON [5].

49 DON poses a real threat to human and livestock health. This mycotoxin is also known as  
50 "vomitoxin" due to its emetic effects after consumption [6]. DON levels present in barley  
51 (*Hordeum vulgare* L.) and wheat (*Triticum aestivum* L.) infected with FHB may vary according  
52 to the time of infection and environmental factors. It is well known that infection is favored by  
53 moist and warm conditions [7, 8]. While the presence of scab can be determined through visual  
54 inspection, the presence of DON cannot. The assessment of disease severity is based on the ratio  
55 of symptomatic spikelets on each spike and the proportion of infected spikes among the tested

56 plants [9]. Although this method is widely used in the screening of resistant germplasms, the results  
57 are subjective. Hence, different types of chromatography for identification and quantification of  
58 mycotoxins in barley are commonly in use [10, 11]. However, due to the time-consuming and  
59 costly nature of these methods, commercial immunometric assays, such as enzyme-linked  
60 immunosorbent assay (ELISA), are frequently used for the monitoring of mycotoxin content [12,  
61 13].

62 Disease control is achieved by the deployment of resistant cultivars. However, breeding for  
63 FHB resistance has proved difficult due to the complex inheritance of the resistance genes [14]  
64 and the strong genotype-by-environment interaction [15].

65 One of the several crop species most vulnerable to FHB infection is barley (*Hordeum*  
66 *vulgare* L.). This species is a cereal crop of major importance, ranked the fourth grain crop in the  
67 world in terms of production volume [16]. Its major uses are both as animal feed and as a  
68 component of human nutrition [17, 18]. In addition, barley is perceived to be a model plant in  
69 genetic study due to genome colinearity and synteny across rye, barley and wheat [19].

70 *Fusarium* poses a real threat for barley plants especially in regions that are prone to have  
71 long periods of wet weather during the flowering stage [4]. Host plants are most vulnerable to  
72 infection during anthesis due to development of fungal spores on anthers and pollen containing  
73 nutrients [20]. Numerous morphological traits have been shown to be associated with FHB  
74 resistance in barley [21]. Heading date, plant height, and spike characters (linked to spike  
75 compactness) are mostly investigated [22, 23]. Days to heading is often negatively correlated with  
76 FHB susceptibility and usually results in disease escape [24]. Hence, using the least susceptible  
77 varieties with different flowering date may reduce FHB risks. Two categories of resistance to FHB  
78 are generally recognized: type I (resistance to initial infection) and type II (resistance to fungal  
79 spread within the spike) [25]. Another kind of resistance has been described as a third type and is  
80 related to the accumulation of mycotoxins within the grains [26].

81 Studies designed to determine the number and chromosomal location of loci contributing  
82 to FHB resistance and the accumulation of DON are urgently needed for the resistance breeding  
83 efforts. Resistance to FHB is a complex trait controlled by multiple genes and affected by  
84 environmental factors [27, 28]. QTL have been identified for both qualitative and quantitative  
85 disease resistance in wheat and barley [4]. Resistance to FHB and DON level content have been  
86 mapped to all seven barley chromosomes [29, 30]. The most common regions related to FHB  
87 resistance have been previously reported on chromosomes 2H and 6H in many studies [3, 25, 31].  
88 Other traits including awned/awnless ears [26] and spike compactness [32] have also been studied.  
89 Plant height is another parameter frequently investigated, and a negative correlation of this trait  
90 with Type I FHB susceptibility has been frequently documented [33].

91 Molecular markers have become increasingly important for plant genome analysis.  
92 Different classes of DNA markers have been developed and implemented over time [34]. A new  
93 genotyping platform followed in 2009 that introduced larger numbers of markers based on SNP  
94 discovery in Next Generation Sequencing data when the Illumina's oligo pool assay as a marker  
95 platform [35] was designed to improve the genotyping process. The 9K iSelect chip contains 7864  
96 SNPs [36] and enables higher efficiency and cost reduction. In the current study this chip was  
97 employed due to the favorable tradeoff between genotyping costs and marker density.

98 This study aimed to map quantitative traits loci linked to agronomic properties in mapping  
99 population grown in field conditions and subjected to artificial *Fusarium* infection. Evaluation of  
100 disease severity was based on both visual assessment of infection and evaluation of deoxynivalenol  
101 content.

102

## 103 **Material and methods**

104

105 Plant material:

106 A 100-RIL population of spring barley obtained from the cross between the Polish cultivar Lubuski  
107 and a Syrian breeding line (Cam/B1/CI08887//CI05761) was studied in field conditions, together  
108 with both parental forms. The plant materials were described in detail in Ogrodowicz et al. [37].

109

#### 110 Field experiment:

111 The experiments were performed in experimental areas belonging to Poznan Plant Breeding  
112 Company (PPB) in three locations: Nagradowice (NAD –Western Poland, 52°19'14"N,  
113 17°08'54"E), Tulce (TUL - Western Poland, 52°20'35.2"N 17°04'32.8"E), Leszno (LES - Western  
114 Poland, 51°50'45"N 16°34'50"E). At each location, the experiments were performed in  
115 randomized blocks with three replications. The effects of the *Fusarium* infection were evaluated  
116 during the 2016 growing season. The two experimental variants were: V1 – variant 1 – control  
117 condition, V2 – variant 2 – inoculation. Control rows were established at a distance of 20.0 m from  
118 the plots designated for inoculation. This isolation was necessary to protect the plants against  
119 infection during inoculation.

120

#### 121 Methodology:

122 Inoculum was prepared just before the inoculations by liquid cultures of *Fusarium culmorum*  
123 (isolate KF846) and 0.0125% of TWEEN®20 (Sigma-Aldrich Chemie GmbH). Conidia  
124 concentration was adjusted to 10<sup>5</sup>/1 mL. Inoculation was performed at flowering stage (BBCH  
125 scale 61). After inoculation the plants were micro-irrigated for three days to maintain moisture.

126

#### 127 Agronomic traits:

128 At maturity, the number of spikelets (NSS), number of kernels (NGS), length of spike without  
129 awns (LS) and grain weight per spike (GWS) were observed on 10 randomly selected plants. In  
130 addition, during investigation, heading date (HD), plant height (HD) and stature of plants (Stature)

131 were recorded. Finally, the plots were harvested and grains from trials were weighed to derive  
132 grain yield per plot (GY). In our study, two additional traits were added to the analysis: the  
133 numbers of sterile spikelets per spike (Sterility) and spike density (Density). The measured traits  
134 with ontology annotation are listed in Table 1.

135

136

137

138

139

140

141

142 Table 1. List of phenotypic traits with description, abbreviations, measured units and ontology annotation.

| Trait (unit)                                                                | Trait description                                                                                                                                  | Abbrev    | Annotation                                                                                        |
|-----------------------------------------------------------------------------|----------------------------------------------------------------------------------------------------------------------------------------------------|-----------|---------------------------------------------------------------------------------------------------|
| Number of spikelets per spike                                               | Number of spikelets in spike from 10 randomly selected spikes in a pot                                                                             | NSS       | <a href="http://purl.obolibrary.org/obo/TO_0000456">http://purl.obolibrary.org/obo/TO_0000456</a> |
| Number of grains per spike                                                  | Number of grains collected from 10 randomly selected spikes in a pot                                                                               | NGS       | <a href="http://purl.obolibrary.org/obo/TO_0002759">http://purl.obolibrary.org/obo/TO_0002759</a> |
| Length of spike (cm)                                                        | Length of spike from 10 randomly selected spikes in a pot (without awns)                                                                           | LS        | <a href="http://purl.obolibrary.org/obo/TO_0000040">http://purl.obolibrary.org/obo/TO_0000040</a> |
| Fertile and sterile spikelets number per spike                              | Fraction of sterile spikelets per spike, calculated as a ratio of number of spikelets per spike (NSS) to number of grains per spike (NGS)          | Sterility | <a href="http://purl.obolibrary.org/obo/TO_0000436">http://purl.obolibrary.org/obo/TO_0000436</a> |
| Spike density/the number of spikelets per unit length (centimeter) of spike | Trait calculated by dividing the number of spikelets per spike by the length of the spike                                                          | Density   | <a href="http://purl.obolibrary.org/obo/TO_0020001">http://purl.obolibrary.org/obo/TO_0020001</a> |
| Grain weight per spike (g)                                                  | Average weight of grain per spike, calculated from 10 randomly selected spikes in a pot                                                            | GWS       | <a href="http://purl.obolibrary.org/obo/TO_0000589">http://purl.obolibrary.org/obo/TO_0000589</a> |
| Grain yield (g)                                                             | Weight of grain harvested per plot                                                                                                                 | GY        | <a href="http://purl.obolibrary.org/obo/TO_0000396">http://purl.obolibrary.org/obo/TO_0000396</a> |
| 1000-grain weight (g)                                                       | Average weight of 1000 grains, calculated as 1000 * average weight of one grain for spikes in a pot                                                | TGW       | <a href="http://purl.obolibrary.org/obo/TO_0000382">http://purl.obolibrary.org/obo/TO_0000382</a> |
| Heading date (number of days)                                               | Number of days from sowing to emergence of inflorescence (spike) from the flag leaf (BBCH), assessed when spikes emerged on at least 50% of plants | HD        | <a href="http://purl.obolibrary.org/obo/TO_0000137">http://purl.obolibrary.org/obo/TO_0000137</a> |
| Length of main stem (cm)                                                    | Average of measurements of length of stem from ground level to the end of spike (with awns) for 10 randomly selected plants in a pot               | LSt       | <a href="http://purl.obolibrary.org/obo/TO_0000576">http://purl.obolibrary.org/obo/TO_0000576</a> |
| Stature                                                                     | Overall size/ shape of plant                                                                                                                       | Stature   |                                                                                                   |
| FHB index                                                                   | Spike infection in % percentage of spikelets affected within a spike / percentage of infected spikes per plot)*100                                 | FHBi      | <a href="http://purl.obolibrary.org/obo/TO_0000662">http://purl.obolibrary.org/obo/TO_0000662</a> |
| DON concentration (ppb)                                                     | Deoxynivalenol content of the grain                                                                                                                | DON       | <a href="http://purl.obolibrary.org/obo/TO_0000669">http://purl.obolibrary.org/obo/TO_0000669</a> |
| Number of damaged kernels                                                   | Number of kernels classified as damaged (pinkish or discoloured) per 10 randomly selected spikes                                                   | FDKn      |                                                                                                   |
| Weight of damaged kernels (g)                                               | Weight of kernels classified as damaged (pinkish or discoloured) per 10 randomly selected spikes                                                   | FDKw      |                                                                                                   |
| Number of healthy kernels                                                   | Number of kernels classified as healthy per 10 randomly selected spikes                                                                            | HLKn      |                                                                                                   |
| Weight of healthy kernels (g)                                               | Weight of kernels classified as healthy per 10 randomly selected spikes                                                                            | HLKw      |                                                                                                   |

144 Disease symptoms evaluation:

145 Disease development was visually scored using the Fusarium Head Blight index (FHBi)  
146 (percentage of infected spikelets within a spike / percentage of infected spikes per plot)  $\times 100$ . After  
147 harvest Fusarium-damaged kernels (FDK) were observed - the number (FDK<sub>n</sub>) and weight  
148 (FDK<sub>w</sub>) of kernels, which were classified as pinkish or discoloured (Fig 1, 2). Those kernels that  
149 appeared to be healthy were scored as HLK (healthy looking kernels – division: HLK<sub>n</sub> and  
150 HLK<sub>w</sub>). FDK and HLK rate was estimated for infected and controlled kernels in one location  
151 (NAD).

152 DON content (mg kg<sup>-1</sup> ppm) from infected grain samples (each experiment with three  
153 replications) was assessed using a Ridascreen®DON competitive enzyme immunoassay kit (R-  
154 Biopharm AG, Darmstadt, Germany) according to the manufacturer's instructions. Absorbance  
155 was measured at 450 nm with a spectrophotometer (Chromate Microplate Reader). The data were  
156 evaluated with RIDA®SOFT Win software. Within a single locations (NAD, TUL, LES) samples  
157 obtained from plants grown in controlled conditions (exposed to natural infection) were pooled  
158 together into one repetition and this pool was assayed as above.

159  
160  
161  
162 Fig 1. Seeds, observed in Lcam plants, with moderate or severe *Fusarium* symptoms. Seeds are thin, with  
163 some dark discolouration. This image was captured at 40 x magnification under the Motic BA410-E  
164 microscope.

165  
166  
167 Fig 2. Abundant mycelial growth observed on the grain surface. This image was captured at 40 x  
168 magnification under the Motic BA410-E microscope.

169  
170  
171  
172 Genotyping:

173 Genomic DNA was extracted from young leaf tissue as described in Mikołajczak et al. 2016 [38].  
174 DNA quantity and concentration were measured with a NanoDrop 2000 (Thermo Scientific™).



175 The DNA samples were diluted to ~ 50 ng/ $\mu$ L and sent to Trait Genetics, Gatersleben, Germany  
176 (<http://www.traitgenetics.com>). The barley iSelect SNP chip contains a total of 7.842 SNPs that  
177 comprise 2.832 of the existing barley oligonucleotide pooled assay (BOPA1 and BOPA2) SNPs  
178 discovered and mapped previously [39, 40], plus 5.010 new SNPs developed from Next  
179 Generation Sequencing data [36, 41]. SNPs which were not polymorphic between the parents,  
180 contained more than 10% of missing values, or with minor allele frequency smaller than 15% were  
181 removed from the markers set.

182

### 183 Map construction:

184 Genetic maps were calculated using the JoinMap 4.1 software [42]. All markers were analyzed for  
185 their goodness of fit using a chi-square test at significance level  $\alpha = 0.05$ . A segregation ratio of  
186 1:1 was expected. Markers with other segregation ratios were categorized as odd. The markers  
187 which were mapped to incorrect regions of the chromosomes were removed from the mapping and  
188 the marker order was calculated again. The localization of markers was designated using the  
189 maximum likelihood algorithm command. Markers were assigned to linkage groups applying the  
190 independence LOD (logarithm of the odds) parameter with LOD threshold values ranging from  
191 6.0 to 9.0. The recombination frequency threshold was set at level  $\leq 4$ . Recombination fractions  
192 were converted to map distances in centimorgans (cM) using the Kosambi mapping function. A  
193 map was drawn using MapChart 2.2

194

### 195 Data analysis and QTLs mapping:

196 Observations for RILs were processed by analysis of variance in a mixed model with fixed effects  
197 for location, treatment and location  $\times$  treatment interaction, and with random effects for line and  
198 interaction of line with location and interaction of line with location and treatment. The residual  
199 maximum likelihood algorithm was used to estimate variance components for random effects and  
200 the F-statistic was computed to assess the significance of the fixed effects. Pearson correlation

201 coefficients between all the analyzed traits were calculated. QTL analysis was performed for the  
202 linkage map with the mixed model approach described by Malosetti et al. [43], including optimal  
203 genetic correlation structure selection and significance threshold estimation. The threshold  
204 for the  $-\log_{10}(\text{P-value})$  statistic was computed by the method of Li and Ji [44] to ensure the  
205 genome-wide error rate was less than 0.01. Selection of the set of QTL effects in the final model  
206 was performed at  $P < 0.05$ ; the P-values for the Wald test were computed as the mean from the  
207 values obtained by adding and dropping the QTL main and interaction effects in the model. All  
208 the above computations were performed in Genstat 16 [45]. RIL lines where the lack of genotypic  
209 data did not exceed 20/15% were used to map QTL. QTL identification was performed for all  
210 studied traits.

211 The detected QTLs were labeled using a system described for wheat and *Arabidopsis* [46,  
212 47], with minor modifications. The QTLs names consist of the prefix Q followed by a two- or  
213 three-letter descriptor of the phenotype (abbreviation of the trait name), an indicator for the  
214 laboratory, the number of the chromosome and a serial number. For traits linked to FDK and HLK  
215 the QTL names were extended by adding the letter “w” or “n” for loci found for trait weight of  
216 FDK, HLK and number of FDK, HLK, respectively.

217 QTL effects in individual trials were considered major if the fraction of explained variance  
218 exceeded 12.32% (upper quartile of the distribution of explained variance) according to the rules  
219 employed by [48] and [49] (with minor modifications).

220 The barleymap pipeline (<http://floresta.eead.csic.es/barleymap>) [50] was used to identify  
221 potential candidate genes underlying the particularly robust QTL of this study. Markers from seven  
222 regions harboring QTLs for studied traits were annotated and the gene search was extended to an  
223 interval of  $\pm 2\text{cM}$  around markers. Overrepresentation analysis (ORA) of GO terms (among high  
224 confidence gene class) was performed using the hypergeometric distribution [51, 52] and applying  
225 the Benjamini–Hochberg correction (FDR level of 0.05) [53].

## 226 **Results**

227

### 228 Phenotypic analysis:

229 The parents of the LCam population were characterized with 11 agronomical traits under two  
230 different conditions (infection and control treatments). Evaluation of disease severity was studied  
231 by using measurements of six FHB-related traits in both type of previously mentioned conditions.  
232 The distributions of trait values among RILs are visualized in Fig 3.

233

234

235

236 Fig 3. Violin plots for studied traits measured in the LCam population in control (V1, green color) and  
237 infected (V2, red color) conditions in three locations. Black symbols: triangle - Lubuski, dot - CamB.

238

239

240 The parental forms were differentiated in terms of all the studied characters (S1 Table).

241 Lubuski showed higher mean values of traits linked to yield performance (e.g. GWS, GY). The  
242 Syrian genotype showed a lower mean value of HD in all trials and under both types of treatments  
243 (heading for CamB was 11 days earlier than for Lubuski).

244 A substantial GY decline was observed for Lubuski in infection condition (40.1%). In  
245 comparison, for CamB a lower relative decline for GY was observed (17.3%). Both mean value  
246 for FHBi and traits associated with visual evaluation of *Fusarium* symptoms (FDK) increased in  
247 the infection conditions. For the Syrian parent a higher mean value of DON concentration was  
248 noted in comparison to that of European parent. For both parental forms low concentrations of  
249 mycotoxin were also observed in control conditions.

250 The mean values of the studied traits for RILs are presented in S2 Table. Relatively high  
251 values of variation coefficients were observed in location NAD under infection for traits: NSS,  
252 NGS, Density, GWS and TGW. In the LES location very high values of CV were noted for traits  
253 FHBi and DON in control conditions.

254 FHBi varied across locations with the mean FHBi ranging from 1.89 to 2.26 under infection  
255 treatment and from 0.62 to 0.99 in control condition (S2 Table). The amount of DON, measured in  
256 grains from infected plants, varied from a maximum of 39990.00  $\mu\text{g kg}^{-1}$  (TUL) to 8060.00  $\mu\text{g}$   
257  $\text{kg}^{-1}$  (NAD). Mean DON values of 26 439.47, 25 684.27 and 27 144.47  $\mu\text{g kg}^{-1}$  for infection  
258 treatment in LES, NAD, TUL were observed, respectively. In control conditions relatively high  
259 coefficients of variation were noted for DON and FHBi.

260 Analysis of variance indicated significant effects of location and treatment on the RIL  
261 population for all traits ( $P < 0.001$ ) with several exceptions (Table 2). In all cases, the variance  
262 components for all types of interactions were smaller than those for lines. For FHBi a significant  
263 line  $\times$  location interaction was noted. No significant interaction was observed for line  $\times$  treatment  
264 in this case. An insignificant effect was noticed in terms of the interaction line  $\times$  location for DON  
265 content.

266 Correlations (based on the mean values for lines over locations) between the studied traits  
267 and FHBi were statistically significant in two types of treatments but values were generally low  
268 (Table 3). FHBi was negatively correlated with NSS, NGS, Sterility, Density, GWS, GY, HD and  
269 LSt at least in one type of treatment. Significant positive correlations were recorded between FHBi  
270 and Sterility in both control and infected conditions. Correlations between FHBi and *Fusarium*  
271 severity parameters (FDK<sub>n</sub>, FDK<sub>w</sub>, HLK<sub>n</sub>, HLK<sub>w</sub>) were significant under both type of treatments  
272 (an exception: HLK<sub>w</sub> in control condition). Positive, marginal correlations were found between  
273 FHBi and traits linked to FDK (FDK<sub>w</sub> and FDK<sub>n</sub>). HLK<sub>n</sub> and HLK<sub>w</sub> showed moderate  
274 correlations with FHBi.

275

276

277 Table 2. ANOVA results and variance components estimated for studied traits

| Trait (abbrev.)  | P-values for effects of |           |                                 | Variance components and std. errors for |            |                             |          |                              |            |                                    |         |
|------------------|-------------------------|-----------|---------------------------------|-----------------------------------------|------------|-----------------------------|----------|------------------------------|------------|------------------------------------|---------|
|                  | location                | treatment | location × treatment interacton | lines                                   | s.e.       | interaction line x location | s.e.     | interaction line x treatment | s.e.       | interaction line location × treatm | s.e.    |
| NSS              | <0.001                  | <0.001    | <0.001                          | 2.447                                   | 0.397      | 0.32                        | 0.135    | 0.02                         | 0.093      | 0                                  | -       |
| NGS              | <0.001                  | <0.001    | <0.001                          | 2.766                                   | 0.446      | 0.394                       | 0.143    | 0.033                        | 0.096      | 0                                  | -       |
| LS               | <0.001                  | <0.001    | <0.001                          | 0.2643                                  | 0.0443     | 0.0634                      | 0.0178   | 0                            | -          | 0.0181                             | 0.0194  |
| Sterility        | <0.001                  | <0.001    | <0.001                          | 0.000139                                | 0.00005    | 0.000251                    | 0.000065 | 0                            | -          | 0                                  | -       |
| Density          | <0.001                  | 0.138     | 0.009                           | 0.0256                                  | 0.00448    | 0.0056                      | 0.00176  | 0.0022                       | 0.00135    | 0                                  | -       |
| GWS              | <0.001                  | <0.001    | <0.001                          | 0.00969                                 | 0.00167    | 0.00144                     | 0.0065   | 0.00065                      | 0.00052    | 0                                  | -       |
| GY               | <0.001                  | <0.001    | 0.006                           | 329.9                                   | 52.8       | 0                           | -        | 0                            | -          | 0                                  | -       |
| TGW              | <0.001                  | <0.001    | <0.001                          | 1.9                                     | 0.87       | 1.22                        | 1.03     | 0.97                         | 0.88       | 0                                  | -       |
| Stature          | 0.927                   | 0.15      | 0.31                            | 3.05756                                 | 0.44322    | 0.25067                     | 0.02747  | 0                            | -          | 0.02229                            | 0.00496 |
| HD               | <0.001                  | <0.001    | 0.035                           | 9.625                                   | 1.419      | 1.142                       | 0.134    | 0.013                        | 0.024      | 0.019                              | 0.041   |
| LSt              | <0.001                  | <0.001    | <0.001                          | 9.55                                    | 2.047      | 5.118                       | 1.414    | 0.519                        | 0.881      | 11.234                             | 1.425   |
| FHBi             | <0.001                  | <0.001    | 0.02                            | 0.0471                                  | 0.0325     | 0.4351                      | 0.0461   | 0.0045                       | 0.0037     | 0.0187                             | 0.0056  |
| DON <sub>x</sub> | <0.001                  |           |                                 | 21271008                                | 3204801    | 0                           | -        | -                            | -          |                                    |         |
| FDKn             | -                       | <0.001    | -                               | 0.000228                                | 0.000082   | -                           | -        | 0.000189                     | 0.000084   | -                                  | -       |
| FDKw             | -                       | <0.001    | -                               | 0.0000157                               | 0.00000595 | -                           | -        | 0.00001913                   | 0.00000611 | -                                  | -       |
| HLKn             | -                       | <0.001    | -                               | 2.568                                   | 0.494      | -                           | -        | 0.248                        | 0.256      | -                                  | -       |
| HLKw             | -                       | <0.001    | -                               | 0.00645                                 | 0.00231    | -                           | -        | 0.00161                      | 0.00244    | -                                  | -       |

278 \* variance component at least three times greater than its standard error

279 s.e.- standard error

280 <sub>x</sub>- ANOVA analysis only for infection condition

281

282

283 Table 3. Correlation coefficients between FHB and studied traits recorded in two types of treatments.  
284

| Trait            | Treatment |         |
|------------------|-----------|---------|
|                  | Infection | Control |
| NSS              | -0.46     | -0.32   |
| NGS              | -0.52     | -0.35   |
| LS               | n.s.      | n.s.    |
| Sterility        | 0.52      | 0.31    |
| Density          | -0.43     | -0.27   |
| GWS              | -0.44     | -0.35   |
| GY               | -0.25     | -0.32   |
| TGW              | n.s.      | n.s.    |
| Stature          | -0.26     | n.s.    |
| HD               | -0.46     | -0.42   |
| LSt              | -0.28     | n.s.    |
| DON              | n.s.      | n.s.    |
| FDK <sub>n</sub> | 0.25      | 0.26    |
| FDK <sub>w</sub> | 0.28      | 0.23    |
| HLK <sub>n</sub> | -0.46     | -0.42   |
| HLK <sub>w</sub> | -0.48     | n.s.    |

285 n.s.- not significant

286 Correlations shown are significant at the P<0.01 level

287

288

289 Linkage map construction:

290 The constructed genetic map comprised of 1947 SNPs distributed on seven linkage groups. The  
291 map length was 1678 cM with an average marker interval of 0.86 cM. The shortest chromosome  
292 was 6H, which harbored 250 markers with a genetic length of 141 cM and an average interloci  
293 distance of 0.56 cM. The longest chromosome was 2H, and it harbored 368 markers with a genetic  
294 length of 291 cM and an average interloci distance of 0.79 cM. The number of markers, marker  
295 density and map length for individual chromosomes are listed in Table 4.

296 Table 4. Map details across each chromosome

|                                    | Chromosome |      |      |      |      |      |      | Total |
|------------------------------------|------------|------|------|------|------|------|------|-------|
|                                    | 1H         | 2H   | 3H   | 4H   | 5H   | 6H   | 7H   |       |
| Number of mapped markers           | 156        | 368  | 324  | 329  | 324  | 250  | 196  | 1947  |
| Map length (cM)                    | 232        | 291  | 241  | 215  | 295  | 141  | 263  | 1678  |
| Mean distance between markers (cM) | 1.48       | 0.79 | 0.74 | 0.65 | 0.91 | 0.56 | 1.30 | 0.86  |

297

## 298 QTL analysis

299  
300 A total of 70 QTLs for all studied traits were found for the LCam population. The numbers of  
301 QTLs were 7, 24, 5, 6, 17, 4, and 7 for chromosomes 1H, 2H, 3H, 4H, 5H, 6H and 7H, respectively.  
302 Moreover, 46 QTLs presented main effects and 38 presented QTL  $\times$  E interaction. The largest  
303 number of QTLs was detected for NSS and TGW (eight QTLs were identified for each trait), and  
304 the smallest for FDK (two QTLs were detected for FDKn and FDKw). 14 QTLs were classified  
305 as major loci and 56 QTLs were described as minor loci. Detailed information, including location,  
306 peak marker, additive effects and explained phenotypic variance for each QTL and trait is  
307 presented in S3 Table.

308

309 S3 Table . QTLs identified in the LCam population for the observed traits.

310

### 311 *Spike characteristics*

312 For the number of spikelets per spike eight QTLs were detected, in chromosomes 1H, 2H, 3H, and  
313 5H. The major QTL (QNSS.IPG-2H\_1) on chromosome 2H (SNP marker BK\_12) showed the  
314 most significant effect for this trait and explained a large proportion of the phenotypic variance  
315 (4.79-71.81%). In this case significant QTL  $\times$  E interaction was noted. A second locus positioned  
316 at 98.67 cM on chromosome 5H also showed a highly significant association with NSS (LogP  
317 statistics = 16.95). Chromosome 1H was the location of the last major QTL (QNSS.IPG-1H\_1) in  
318 the vicinity of marker BOPA1\_4625-1413. The remaining five NSS QTLs showed minor effects.  
319 Out of the eight QTLs detected for NSS, three (QNSS.IPG-1H\_2, QNSS.IPG-2H\_2 and  
320 QNSS.IPG-3H\_2) were associated with a significant increase in this trait contributed by Syrian  
321 parent alleles.

322 Five QTLs were found for the number of grains per spike. QNGS.IPG-2H was found in the  
323 vicinity of marker BK\_12. This locus was positioned at 22 cM on chromosome 2H. The second

324 major QTL was detected on chromosome 5H in the vicinity of marker BOPA2\_12\_30929. For this  
325 QTL no significant additive effects were recorded in NAD location. The other QTLs (QNGS.IPG-  
326 1H\_1, QNGS.IPG-1H\_2 and QNGS.IPG-5H\_2) were classified as minor QTLs. All studied QTLs  
327 for NGS were with alleles of European genotype contributing to an increasing of number of grains  
328 per spike.

329 Three QTLs were reported for the length of spike (QLS.IPG-1H, QLS.IPG-2H and  
330 QLS.IPG-5H). All detected loci were classified as major ( $\geq 12.32\%$  PVE) and the effects of these  
331 QTLs were stable over environments (treatments). All QTLs were associated with a significant  
332 increase in LS contributed by Lubuski. The main QTL was found on chromosome 2H in the vicinity  
333 of marker BK\_13. In total, five QTLs were identified for sterility. On chromosome 2H, two major  
334 QTLs were detected (QSte.IPG-2H\_1 and QSte.IPG-2H\_2). The first QTL, QSte.IPG-2H\_1, was  
335 located in the vicinity of marker SCRI\_RS\_154030 and showed the highest LogP value of all  
336 detected QTLs controlling this trait. The second sterility QTL was located on chromosome 2H 5.6  
337 cM from marker SCRI\_RS\_230497. One major QTL (QSte.IPG-5H\_2) was detected on  
338 chromosome 5H. None of the mentioned QTLs had significant additive effects in control condition  
339 in LES location and in infection conditions in NAD location. On chromosome 7H, a minor QTL  
340 for sterility was identified – QSte. IPG-7H. All QTLs detected for this character were with alleles  
341 of Syrian genotype contributing to the increase in sterility with the exception of QSte.IPG-5H\_1,  
342 where Lubuski alleles determined the increase. Interaction with the environment was found for all  
343 but one detected QTLs (an exception was QSte.IPG-7H).

344 Six QTLs controlling density were detected on chromosomes 2H and 5H with a PVE  
345 ranging from 0.01 to 31.43%. Half of those QTLs displayed significant QTL  $\times$  E interaction. The  
346 main QTL (LogP=15.17) was found on the upper arm of chromosome 2H mapped in marker  
347 BK\_22. Concurrently, this QTL was the only locus associated with Density, where Lubuski alleles  
348 conferred a positive effect in increasing this trait, while the Syrian parent alleles at the other five



349 QTLs contributed positively to Density. The second major QTL (QDen.IPG-2H\_2) was also found  
350 on chromosome 2H at position 113.9 cM. On chromosome 2H two other minor QTLs were  
351 identified for Density QTL (QDen.IPG-2H\_2 and QDen.IPG-2H\_4) with a stable effect, mapped  
352 in the vicinity of BOPA1\_5537-283. QDen.IPG-5H\_1 was also found on chromosome 5H at  
353 position 93.9 cM. The additive effects of this QTL was significant only in two locations (NAD and  
354 TUL). For Density two minor QTLs were found – QDen.IPG-2H\_3 and QDen.IPG-5H\_2, for  
355 which the smallest LogP values were recorded for Density in this study.

356

357

### 358 *Grain traits*

359 Grain weight per spike was mapped to seven loci. The main GWS QTL (QGWS.IPG-2H\_1) was  
360 found on chromosome 2H in the vicinity of marker BK\_22. This locus, with a PVE ranging from  
361 31.74 – 57.92%, was the only GWS QTL where no significant QTL × E interaction was detected.  
362 QGWS.IPG-5H was found on chromosome 5H and the nearest marker (BOPA1\_4795-782) was  
363 1.37 cM away from the corresponding QTL peak. Two other major QTLs (QGWS.IPG-7H\_1 and  
364 QGWS.IPG-7H\_2) controlling GWS were reported on chromosome 7H. Both of these QTLs had  
365 a significant additive effect only in single location. Minor QGWS.IPG-4H\_2 was found on  
366 chromosome 4H at position 127.40 cM. The European parent contributed to the increase in GWS  
367 for all detected QTLs for this trait (exceptions: two QTLs – minor QGWS.IPG-2H\_2 and major  
368 QGWS.IPG-4H\_1 identified on chromosomes 2H and 4H, respectively).

369 Out of four QTLs found for grain yield, only one was classified as major (PVE > 12.32%).

370 In addition, no significant additive effects were noticed for any detected loci in infection conditions  
371 for NAD location. The main QGY.IPG-2H was located on chromosome 2H and linked to marker  
372 BK\_22. No QTL × E interaction was found for GWS QTLs detected in the mapping population  
373 and in all cases positive alleles were attributed to European parents.

374           Eight QTLs were reported for thousand grain weight. QTGW.IPG-2H\_1 and QTGW.IPG-  
375 4H\_1 were identified on chromosomes 2H and 4H, respectively, but their additive effects were  
376 significant only in infection (LES) and control conditions (NAD). On chromosome 4H, TGW QTL  
377 was found with a stable and positive effect from the Lubuski genotype. QTGW.IPG-6H\_2 locus  
378 on chromosome 6H was determined by Syrian parent genotype alleles contributing positively to  
379 TGW. In this locus no significant QTL  $\times$  environment interaction for TGW was also observed.  
380 Major QTGW.IPG-7H\_1 with stable effects from the CamB allele significantly increasing TGW  
381 was identified on chromosome 7H. On the same chromosome was found QTGW.IPG-7H\_2, but  
382 the additive effects of this QTL were significant only in three treatments. QTGW.IPG-2H\_2 and  
383 QTGW.IPG-6H\_1, detected on chromosome 2H and 6H, respectively, were classified as minor  
384 QTLs.

385  
386 *Heading day and height*  
387 Two QTLs (QHD.IPG-2H and QHD.IPG-5H) were reported for heading date. The main QTL was  
388 located on chromosome 2H in the vicinity of marker BK\_22. The „late” allele (high HD value)  
389 was contributed by European parent. In contrast, at the second locus, classified as a minor QTL,  
390 the CamB alleles conferred a positive effect by increasing this trait. For both loci, no QTL  $\times$  E  
391 interaction was detected.

392           Seven loci for length of main stem were found in the LCam population. The main locus  
393 (QLSt.IPG-2H\_1) was detected on chromosome 2H in the vicinity of marker BK\_13 at position  
394 21 cM. This QTL explained a large portion of the variance for LSt (from 13.88 to 41.68%). The  
395 Lubuski alleles contributed to the increase in LSt at this locus. The second major QTL was reported  
396 on chromosome 1H with stable and positive effects on the length of the main stem contributed by  
397 the European parent genotype. QLSt.IPG-4H\_2 and QLSt.IPG-5H were identified on  
398 chromosomes 4H and 5H, respectively. These QTLs were classified as major loci, but their  
399 additive effects were not significant in some treatments (e.g. control conditions in NAD location).

400 Three minor LSt loci were found – QLSt.IPG-2H\_2, QLSt.IPG-3H and QLSt.IPG-4H\_1 detected  
401 on chromosomes 2H, 3H and 4H, respectively.

402

#### 403 *Fusarium symptoms and DON content*

404 Six QTLs were reported for the FHB index. The main QTL (QFHBi.IPG-2H\_1) was found on  
405 chromosome 2H in the vicinity of marker BOPA1\_5880-2547 at position 23.10 cM. The CamB  
406 alleles positively contributed to the increase in the FHB index at this locus and significant QTL ×  
407 E interaction was detected for QFHBi.IPG-2H\_1. On the same chromosome another FHBi QTL  
408 was reported which was located at position 87.70 cM but additive effects of this locus were  
409 significant only in one location (TUL). The next major locus (QFHBi.IPG-2H\_3) was also detected  
410 on chromosome 2H with stable and positive effects of Syrian parent alleles responsible for  
411 increasing the FHBi. In contrast, the European parent alleles conferred a positive effect in  
412 increasing the FHBi at the locus found on chromosome 5H (QFHBi.IPG-5H). For this QTL no  
413 significant additive effects were detected in LES location. Two minor loci – QFHBi.IPG-3H and  
414 QFHBi.IPG-7H were reported on chromosome 3H and 7H, respectively.

415 Four QTLs were found for traits linked to *Fusarium* damaged kernels. These loci were  
416 located on chromosomes 5H and 6H. The main QFDKn.IPG-5H was detected in the vicinity of  
417 SCRI\_RS\_165578, where Lubuski genotype significantly increased the FDKn. The second major  
418 locus (QFDKw.IPG-5H) was identified at the position 87.80 cM and showed positive effects on  
419 this trait contributed by European parent alleles. Two remaining loci found on chromosome 6H  
420 (QFDKn.IPG-6H and QFDKw.IPG-6H) were classified as minor QTLs.

421 Five QTLs were detected for traits associated with healthy looking kernels (HLKw and  
422 HLKn). The main QHLKn.IPG-2H\_2 was found on the short arm of chromosome 2H (marker  
423 BK\_13) and showed stable and positive effects of Lubuski genotype alleles which contributed to  
424 the increase in HLKn. Two minor QTLs were recorded for HLKn on chromosomes 2H and 5H.

425 For both loci no significant QTL x E interaction was detected. Two major loci (QHLKw.IPG-2H  
426 and Q\_HLKw.IPG-7H) were found for the trait HLKw. The Lubuski alleles were responsible for  
427 increasing HLKw in both loci but only one QTL (QHLKw.IPG-2H) had stable effects.

428

#### 429 Co-localized or pleiotropic QTLs

430 A total of eight chromosomal regions (named A-G) harboring QTLs for studied traits were  
431 assigned. These regions (hotspots), listed in Table 5, were designed based on their proximity to  
432 each other (0-5 cM).

433 Five QTLs were reported in region A located on the top of chromosome 1H, namely  
434 associated with SNP BOPA1\_4625-1413. Region B identified on the upper arm of chromosome  
435 2H contained to 10 loci. In most cases, QTLs from region B were detected in the vicinity of marker  
436 BK\_12 (Fig 4). Out of the five QTLs detected in region C assigned on the same chromosome, four  
437 were found in the vicinity of marker BOPA2\_12\_10937. Region D harbored two QTLs found at  
438 the same position (127.40 cM) but these loci were linked to different SNP markers. Region E  
439 (chromosome 5H) harbored six QTLs – both QDen.IPG-5H\_1 and QFHB.IPG-5H were found in  
440 this region in the vicinity of marker SCRI\_RS\_184066 and both QNGS.IPG-5H\_1 and QLSt.IPG-  
441 5H were detected in the vicinity of marker BOPA2\_12\_30929. On the same chromosome, the next  
442 region was noted (named region F). Out of the four QTLs reported on this region, two were found  
443 in the vicinity of marker SCRI\_RS\_206867. Region F on chromosome 7H harbored two loci  
444 associated with marker SCRI\_RS\_159555.

445

446

447

448

449

450

451 Table 5. Regions harboring QTLs for studied traits with the names of the nearest SNP markers

452

| name of hotspo | Trait   | QTL ID        | Chromosome | Position (cM) | Nearest marker  |
|----------------|---------|---------------|------------|---------------|-----------------|
| A              | NSS     | QNSS.IPG-1H_1 | 1H         | 0,00          | BOPA1_4625-1413 |
|                | NGS     | QNGS.IPG-1H_1 | 1H         | 0,00          | BOPA1_4625-1413 |
|                | LS      | QLS.IPG-1H    | 1H         | 0,00          | BOPA1_4625-1413 |
|                | LSt     | QLSt.IPG-1H   | 1H         | 0,00          | BOPA1_4625-1413 |
|                | GY      | QGY.IPG-1H    | 1H         | 0,00          | BOPA1_4625-1413 |
| B              | LS      | QLS.IPG-2H    | 2H         | 21,00         | BK_13           |
|                | LSt     | QLSt.IPG-2H_1 | 2H         | 21,00         | BK_13           |
|                | NSS     | QNSS.IPG-2H_1 | 2H         | 22,00         | BK_12           |
|                | NGS     | QNGS.IPG-2H   | 2H         | 22,00         | BK_12           |
|                | Density | QDen.IPG-2H_1 | 2H         | 22,00         | BK_12           |
|                | GWS     | QGWS.IPG-2H_1 | 2H         | 22,00         | BK_12           |
|                | GY      | QGY.IPG-2H    | 2H         | 22,00         | BK_12           |
|                | HD      | QHD.IPG-2H    | 2H         | 22,00         | BK_12           |
|                | HLKw    | QHLKw.IPG-2H  | 2H         | 22,00         | BK_12           |
|                | FHBi    | QFHB.IPG-2H_1 | 2H         | 23,10         | BOPA1_5880-2547 |
| C              | Density | QDen.IPG-2H_3 | 2H         | 225,26        | BOPA2_12_10937  |
|                | LSt     | QLSt.IPG-2H_2 | 2H         | 225,26        | BOPA2_12_10937  |
|                | GWS     | QGWS.IPG-2H_1 | 2H         | 228,70        | BOPA2_12_10937  |
|                | TGW     | QTGW.IPG-2H_1 | 2H         | 228,70        | BOPA2_12_10937  |
|                | NSS     | QNSS.IPG-2H_2 | 2H         | 229,80        | SCRI_RS_174051  |
| D              | TGW     | QTGW.IPG-4H_1 | 4H         | 127,40        | BOPA1_2196-195  |
|                | GWS     | QGWS.IPG-4H_1 | 4H         | 127,40        | BOPA1_2196-195  |
| E              | Density | QDen.IPG-5H_1 | 5H         | 93,90         | SCRI_RS_184066  |
|                | FHBi    | QFHB.IPG-5H   | 5H         | 95,60         | SCRI_RS_184066  |
|                | NGS     | QNGS.IPG-5H_1 | 5H         | 97,30         | BOPA2_12_30929  |
|                | LSt     | QLSt.IPG-5H   | 5H         | 97,30         | BOPA2_12_30929  |
|                | LS      | QLS.IPG-5H    | 5H         | 97,30         | BOPA2_12_30929  |
|                | NSS     | QNSS.IPG-5H_1 | 5H         | 98,67         | SCRI_RS_235055  |
| F              | GY      | QGY.IPG-5H    | 5H         | 285,20        | BOPA2_12_30533  |
|                | NSS     | QNSS.IPG-5H_2 | 5H         | 286,90        | SCRI_RS_206867  |
|                | NGS     | QNGS.IPG-5H_2 | 5H         | 286,90        | SCRI_RS_206867  |
|                | HLKn    | QHLKn.IPG-5H  | 5H         | 288,00        | SCRI_RS_165919  |
| G              | GWS     | QGWS.IPG-7H_1 | 7H         | 119,80        | SCRI_RS_159555  |
|                | TGW     | QTGW.IPG-7H_1 | 7H         | 119,80        | SCRI_RS_159555  |

453

454

455 Fig 4. Locations of regions (A – chromosome 1H and B,C – chromosome 2H) harboring QTLs detected for  
 456 studied traits in the LCam population. Ppd-H1 gene localisation and corresponding markers were shown.  
 457 Genetic distance scale in centiMorgan (cM) is place in the left margin.

458

459

460 An overrepresentation analysis was performed to identify enriched Gene Ontology (GO)

461 terms – cellular component, molecular function and biological process - associated with regions

462 listed in Table 5, containing QTLs connected to FHB. There are multiple genes that are in the  
 463 regions - hotspot associated with traits analyzed in this study. Based on gene annotation and  
 464 literature studies, selected candidate genes related to disease resistance were shown in Table 6.

465  
 466 Table 6. Selected candidate genes identified by using the Barleymap database  
 467 (<http://floresta.eead.csic.es/barleymap>).

| Hotspot name     | Marker           | chr   | Gene class                                | Description                                 |
|------------------|------------------|-------|-------------------------------------------|---------------------------------------------|
| B                | HORVU2Hr1G013390 | chr2H | HC_G                                      | UDP-Glycosyltransferase superfamily protein |
|                  | HORVU2Hr1G013400 | chr2H | HC_G                                      | pseudo-response regulator 7                 |
|                  | HORVU2Hr1G013590 | chr2H | HC_G                                      | Glycosyltransferase                         |
|                  | HORVU2Hr1G013630 | chr2H | HC_G                                      | Glycosyltransferase                         |
|                  | HORVU2Hr1G014020 | chr2H | HC_G                                      | Jasmonate-induced protein                   |
|                  | HORVU2Hr1G014050 | chr2H | HC_G                                      | 26S protease regulatory subunit 6B homolog  |
|                  | HORVU2Hr1G014060 | chr2H | HC_G                                      | 26S protease regulatory subunit 6B          |
|                  | HORVU2Hr1G014080 | chr2H | HC_G                                      | 26S protease regulatory subunit 6B homolog  |
|                  | HORVU2Hr1G014440 | chr2H | HC_G                                      | ubiquitin-activating enzyme 1               |
|                  | HORVU2Hr1G014500 | chr2H | HC_G                                      | Pathogenesis-related protein 1-8            |
| HORVU2Hr1G014770 | chr2H            | HC_G  | 26S protease regulatory subunit 4 homolog |                                             |
| E                | HORVU5Hr1G095010 | chr5H | HC_G                                      | UDP-Glycosyltransferase superfamily protein |
|                  | HORVU5Hr1G096210 | chr5H | HC_G                                      | UDP-Glycosyltransferase superfamily protein |
|                  | HORVU5Hr1G096230 | chr5H | HC_G                                      | UDP-Glycosyltransferase superfamily protein |
|                  | HORVU5Hr1G096240 | chr5H | HC_G                                      | UDP-Glycosyltransferase superfamily protein |
|                  | HORVU5Hr1G096260 | chr5H | HC_G                                      | UDP-Glycosyltransferase superfamily protein |
|                  | HORVU5Hr1G096310 | chr5H | HC_G                                      | UDP-Glycosyltransferase superfamily protein |
|                  | HORVU5Hr1G096320 | chr5H | HC_G                                      | UDP-Glycosyltransferase superfamily protein |
|                  | HORVU5Hr1G096340 | chr5H | HC_G                                      | UDP-Glycosyltransferase superfamily protein |
|                  | HORVU5Hr1G096360 | chr5H | HC_G                                      | UDP-Glycosyltransferase superfamily protein |
|                  | HORVU5Hr1G095350 | chr5H | HC_G                                      | Glucan endo-1,3-beta-glucosidase 11         |
| HORVU5Hr1G095380 | chr5H            | HC_G  | Glucan endo-1,3-beta-glucosidase 11       |                                             |
| HORVU5Hr1G095420 | chr5H            | HC_G  | Glucan endo-1,3-beta-glucosidase 7        |                                             |
| F                | HORVU5Hr1G071810 | chr5H | HC_G                                      | Auxin response factor 10                    |
|                  | HORVU5Hr1G071940 | chr5H | HC_G                                      | UDP-Glycosyltransferase superfamily protein |
|                  | HORVU5Hr1G073630 | chr5H | HC_G                                      | Auxin efflux carrier family protein         |
|                  | HORVU5Hr1G073670 | chr5H | HC_G                                      | Auxin efflux carrier family protein         |

468

469

470

471

472

473

474

## 475 Discussion

476  
477 It is widely known that a mapping population derived from parents divergent in genetic  
478 composition allows high performance QTL analysis. In this study, RILs (named LCam) derived  
479 from a European variety and a Syrian breeding line were used for QTL analysis. Both parental  
480 forms were differentiated in terms of stature, grain yield, HD and resistance/tolerance to biotic and  
481 abiotic stresses [37, 38]. CamB is unadapted to the Central Europe region and has undesired  
482 agronomical traits such as early heading and tall stature. Lubuski is an old cultivar with agro-  
483 morphological-physiological characters adapted to Polish climatic conditions during a long  
484 cultivation period. With the aim of providing the genetic variability between the parents of the  
485 mapping population and increasing the chance to indentifying loci linked to FHB we conducted  
486 field experiments using RILs derived from a cross between Lubuski and CamB genotypes.

487 FHB, caused by *Fusarium culmorum*, is a very important disease of crops globally [9].  
488 Damage caused by *Fusarium* species fungus includes reduced grain yield, and reduced grain  
489 functional quality, and results in the presence of the mycotoxin deoxynivalenol in FDK (and also  
490 in grains without any visible symptoms). The development of FHB resistant crop cultivars is an  
491 important component of integrated breeding management [54, 55]. The objective of this  
492 investigation was to identify QTLs for traits linked to yield performance in a recombinant inbred  
493 line population grown under a disease-free environment and under *Fusarium* infection conditions.

494 FHB infection can be evaluated in different ways. In field conditions, FHB can be  
495 determined, among others, by visual inspection of the percentage of infected spikelets [56]. This  
496 percentages can be used to determine an FHB index [57]. In this study, different tools were  
497 employed to estimate disease severity: FHBi was calculated as: (spike infection in % percentage  
498 of spikelets affected within a spike) / (percentage of infected spikes per plot). After harvest,  
499 percentage both FDK and HLK as described by the visual symptom score of the kernels and the  
500 weight of the kernels were evaluated. In addition, DON concentration was quantified.



501 In this study Lubuski was less susceptible to FHB than Syrian parent in all type of  
502 conditions in terms of DON accumulation. On the other hand, we observed a higher FHBi value  
503 for Lubuski plants in infection conditions. DON tests of grains harvested from the LCam  
504 population showed that some RILs showed lower DON content values than CamB, while some  
505 other RILs were more susceptible than Lubuski. In all types of conditions, the mean values of  
506 agronomic traits performed as expected – biotic stress conditions impaired yields. In control  
507 conditions, DON contamination represents the natural occurrence of FHB [58] and the level of  
508 mycotoxin accumulation varied significantly from the ones observed in LCam plants grown in  
509 infection conditions.

510 Most of the correlation coefficients among the FHBi and other studied characters were  
511 negative and statistically different from zero ( $P < 0.01$ ). The Pearson correlation coefficient was also  
512 significantly negative between FHBi and the two main traits of our interest – HD and LSt, which  
513 is in agreement with previous studies [59–61], where plants with lower FHB severities have  
514 usually been characterized by late heading and tall stature. Late-maturing plants may head during  
515 a time in the summer less suitable for infection, and tall plants avoid higher concentrations of  
516 inoculum near the surface of the soil [62]. Another study, conducted by Mesfin et al. [24]  
517 concluded that late HD may be linked to FHB resistance since the heads experience less exposure  
518 time to fungal spores.

519 Visual ratings for FHB in barley plants are usually conducted just before the spikes begin  
520 to lose chlorophyll so disease symptoms can be easily counted. In some years, there are favorable  
521 conditions for *Fusarium* growth and DON accumulation throughout plant senescence, reducing  
522 correlations between FHB and DON because the FHB score does not accurately reflect the final  
523 disease level [63]. It is well known that symptomless spikes can be contaminated with DON [64].  
524 Traditionally, mycotoxin determination has mainly been performed by chromatographic  
525 techniques [65, 66]. ELISA has been proposed as an alternative method to visual scoring and DON



526 quantification for measuring FHB [67] (Hill et al. 2008). Expression of DON by fungal mycelium  
527 is environmentally dependent [68], whereas the expression of monoclonal antibody-specific  
528 mycelial proteins is not [69]. In consequence, ELISA and DON values are not always closely  
529 correlated. In our study, no correlation was found between FHBi and DON level content, which  
530 can be explained by this phenomenon.

531 Agronomic traits related to spike characters (e.g., spike density and sterility) have been  
532 reported to be linked to FHB resistance but the association between the traits and FHB  
533 vulnerability seems to be unclear. Steffenson et al. [70] reported that FHB severity was apparently  
534 higher in dense spike NILs than in lax spikes. A negative correlation between FHB severity and  
535 spike density has been recorded in an experiment conducted on a population derived from two-  
536 row and six-row barley plants [71]. In contrast, in the study conducted by Yoshida et al. [72] on  
537 barley NILs spike density had little or no effect. Ma et al. [73] also reported an association between  
538 lax spike and FHB reaction. Lax spikes may be related to FHB resistance due to their specific  
539 architecture that retains, presumably, less moisture within the whole spike. This decreases the pace  
540 of fungus spread [4]. In the presented study negative correlations were detected between the traits  
541 Density and FHBi, indicating that spike compactness may be one of the factors enhancing FHB  
542 susceptibility. A positive correlation was recorded between Sterility and FHBi for LCam plants,  
543 which means that FHB infection has negative effects on seed development, as expected.

544 Single nucleotide polymorphisms (SNPs) that are widely distributed throughout the  
545 genome have been used in QTL mapping [74, 75]. In our previous study using 1536 SNP markers,  
546 we developed genetic map which allowed us to identify a set of QTLs linked to different agronomic  
547 traits (among others: HD and plant height) in field [38] and greenhouse conditions [37]. In this  
548 study, by using a 9K SNP array, we improved the QTL mapping resolution due to increased marker  
549 density.

550 The SNP markers were distributed across all seven linkage groups in the LCam mapping  
551 population. Marker order and distances for SNPs generally matched previously published barley  
552 maps [40, 76]. The genetic map consisting of 1947 SNPs which has been developed in this  
553 investigation, covering 1678 cM, is larger than other maps (e.g., constructed by Wang et al. [77]  
554 – 1375.8 cM.

555 Many bi-parental mapping studies have been conducted on barley to explain the genetic  
556 architecture of resistance to FHB and DON accumulation and to identify molecular markers that  
557 could be useful in breeding [24, 31, 78, 79]. FHB resistance has frequently been found to be  
558 associated with plant morphology parameters, especially plant height, spike architecture, anther  
559 extrusion and HD acting mainly as passive resistance factors. For this reason, the LCam population  
560 was also evaluated for HD, plant height, spike compactness and other traits, which seem to be  
561 important from an agronomic point of view. Numerous QTL mapping studies that have been  
562 conducted in different crop species have revealed that QTLs associated with FHB resistance are  
563 coincident with QTLs linked to various agronomic and morphological traits [4, 24, 79]. In our  
564 investigation, a set of 70 QTLs were detected in seven barley chromosomes. A higher number of  
565 QTLs for agronomic traits was found on chromosome 2H, where the greatest number of FHB-  
566 linked QTLs was also identified.

567 QTLs for FHB resistance have been found on all seven barley chromosomes [24, 31, 78–  
568 81]. For most of the resistance varieties, QTLs associated with FHB were detected on the long arm  
569 of chromosome 2H [30, 31, 82]. In addition, QTLs for disease resistance and reduced DON  
570 concentration have been linked to spike morphology controlled by *vrs1* and a major HD locus  
571 (*Ppd-H1*) in numerous studies [80]. The number of detected QTLs varies depending on the type  
572 of research, ranging from only one in the study conducted by Mesfin et al. [24] to two [4, 31, 73]  
573 or even to 10 QTLs [22]. For many FHB regions in the barley genome, QTLs for DON  
574 concentration have been detected both for barley [81, 82] and for wheat [83, 84] but this kind of

575 coincidence has not been reported as significant in all studies [30]. Identification of QTLs linked  
576 to FHB symptoms has been confounded by agronomic characters such as HD, plant height or  
577 properties associated with spike morphology [24, 79]. Hence, mapping of traits characterized by  
578 strong phenotypic correlations constitutes a challenge in terms of pleiotropy/linkage. Massman et  
579 al. [80] have summarized previously described FHB regions and showed all detected QTLs in a  
580 graph associated with genome location (bin). The QTLs were located on chromosome 2H at three  
581 different spots (bin 8, bin 10 and bin 13-14). In our investigation, six QTLs related do FHBi were  
582 found. Out of these QTLs, three were identified on chromosome 2H at position 23.1, 87.7 and  
583 216.7 cM corresponding to previously mentioned bin locations. Three other loci: QFHB.IPG-3H,  
584 QFHB.IPG-5H and QFHB.IPG-7H were found on chromosomes 3H, 5H and 7H, respectively.  
585 QFHB.IPG-2H\_1 was found on the short arm of chromosome 2H in the vicinity of SNP marker  
586 BOPA1\_5880-2547 and this explains the largest percentage of phenotyping variance (3.69 –  
587 30.69) of all detected FHB QTLs. The Syrian parent alleles positively contributed to the increase  
588 in FHBi at this locus, which is in accordance with previous studies, in which early heading plants  
589 were vulnerable to FHB symptoms. In our study, the main QTL for HD was located on  
590 chromosome 2H in the vicinity of marker BK\_12 at position 22 cM, shifted 1.1 cM from marker  
591 BOPA1\_5880-2547. According to Turner et al. [85] the most significant SNP marker (BK\_12) is  
592 directly located within the *Ppd-H1* gene, which is the main determinant of response to long day  
593 conditions in barley. The 2Hb8 QTL is also considered a major locus for resistance to FHB and  
594 DON accumulation [86]. Delayed head emergence may increase the likelihood that the host will  
595 escape infection by the pathogen [71, 87]. On the other hand, late heading is undesirable in  
596 breeding programs addressed to arid regions [88]. Plants with lower FHB severities usually have  
597 one or more of the following traits: late heading, increased height and two-rowed spike  
598 morphology [59, 60, 70]. Although tall plants are usually more resistant to disease than short plant  
599 [73], heading date can be either negatively [71, 73] or positively correlated with DON content in

600 the seeds [22, 24]. The main QTL associated with heading and located on chromosome 2H  
601 (Q.HD.LC-2H), was also identified at SNP marker 5880–2547, in our previous study [37]. SNP  
602 5880–2547 was the closest marker to QTLs associated with plant architecture, spike morphology  
603 and grain yield in the mentioned experiment. None of the detected QTLs for FHBi in the current  
604 study were classified as major loci (the highest value of LogP value was 8.14 recorded for  
605 QFHB.IPG-2H\_3), but this could be explained by the fact that the identification of many minor  
606 QTLs associated with the model of complex traits that predicts an exponential decay of QTL  
607 effects only a few loci but has large effects [89].

608 Plant height is under polygenic control and represents one of the most important agronomic  
609 traits for barley [90, 91]. The right timing of flowering time allows optimal grain development  
610 with regard to the availability of heat, light and water, while semi-dwarf cereals allocate more  
611 resources into grain production than taller plants and show reduced losses through lodging [92, 93].  
612 In addition, due to increasing of moisture content of the plants, lodging causes the infection  
613 expansion [94]. In the current study were detected seven loci for LSt. The main locus (QLSt.IPG-  
614 2H\_1) was detected on chromosome 2H in the vicinity of marker BK\_13, which coincided with  
615 the main HD QTL. In this study only one locus was found on chromosome 3H, where *sdw1/denso*  
616 has been located in our previous investigations [38, 90, 95]. There is a gradient at ascospore  
617 concentration from the soil surface to upper part of plant stem. Thus, short plant tend to have higher  
618 FHB infection level [96], which is in accordance with our results.

619 In barley, spike length and spike characters like number of grains and spikelets per spike  
620 are perceived as an important agromorphological traits due a direct impact on crop yield [97]. The  
621 spike architecture has significant influence on yield and might alter the spike microenvironment  
622 making it less favorable for fungal infection [98]. In the current study six QTLs linked to Density  
623 were found. Out of six detected QTLs, four loci were found on chromosome 2H. The major QTL  
624 (QDen.IPG-2H-1) was located on the short arm of 2H in the vicinity of marker BK\_12. Two QTLs

625 related to the density of the spike were found on chromosome 5H. In most cases CamB alleles  
626 contributed positively to this trait. In many studies plants with lax spikes have been reported as  
627 less vulnerable for fungal infection [82, 98]. On the other hand, Yoshida et al. [62] found no  
628 differences between genotypes when compared barleys with normal and dense type of spike.  
629 Steffenson et al. [70] showed that FHB severity was higher in dense spike NILs than in lax spike  
630 plants but no significant differences were found. Langevin et al. [99], conducting the study using  
631 barley with two- and six-row type of spike, concluded that the high level of DON contamination  
632 observed among dense spikes accrued mainly because of direct contact of the florets. To  
633 summarize, results for the association between disease severity and spike architecture of the barley  
634 plants are not consistent.

635 The genes encoding UDP-Glycosyltransferase superfamily protein were found for all  
636 hotspots containing QTLs linked to FHB (FHBi, HLKn, HLKw). Plant uridine diphosphate  
637 (UDP)-glucosyltransferases (UGT) catalyze the glucosylation of xenobiotic, endogenous  
638 substrates and phytotoxic agents produced by pathogens such as mycotoxins [100, 101]. The  
639 studies have shown that plant UDP-glucosyltransferase genes have significant role in plant  
640 resistance both to biotic and abiotic stresses [102, 103]. Poppenberger et al. [104] demonstrated  
641 that DON resistance can be achieved by the enzymatic conversion (a natural detoxification  
642 process in plants called glycosylation) of the toxin into the non-toxic form (DON-3-O-glucoside)  
643 by UDP-glucosyltransferase. It is also worth to mention that in our study 10 records have been  
644 annotated for region E, where FHBi QTL was found on chromosome 5H. Recently the HvUGT-  
645 10 W1 gene has been isolated from an FHB resistant barley variety conferred FHB tolerance [102].

646 Region B, as tightly linked to the QTLs identified for FHBi and HD in this study, has been  
647 annotated also as pathogenesis-related protein 1-8 (HORVU2Hr1G014500). These type of  
648 proteins belong to the antimicrobial compounds playing an important role in defense response  
649 against fungal infection. Induction of PR (Pathogen-related)- proteins has been found in many

650 plant species belonging to various families [105]. For instance, Pritsch et al. [106] observed that  
651 the transcripts of defense response genes, peroxidase and PR-1 to -5, accumulated as early as 6 to  
652 12 h after wheat spikes were inoculated with *F. graminearum*.

653 Another gene annotation linked to disease resistance was shown for region B. Glucan endo-  
654 1,3-beta-glucosidase may provide a degree of protection against microbial invasion of germinated  
655 barley grain through its ability to degrade fungal cell wall polysaccharides, according to  
656 Balasubramanian et al. [107].

657 Data obtained from Barley Map Floresta database allowed us to annotate both in region F  
658 and B candidate genes related to two types of phytohormones, which play pivotal roles in  
659 regulation of this defence network [108]. Several regions identified in our analysis included  
660 annotations associated with auxin (HORVU5Hr1G071810 - auxin response factor 10;  
661 HORVU5Hr1G073630, chr5H, HORVU5Hr1G073670 - auxin efflux carrier family protein) in  
662 region F. The roles of auxins in plant-pathogen interactions have also been described in recent  
663 years [109, 110]. Another phytohormone annotation (jasmonate-induced protein) was present in  
664 the region B. Jasmonic acid (JA) is considered to be a critical phytohormone for plant defense  
665 response against pathogens [111]. For instance, Gottwald et al. [112] suggested that Jasmonate  
666 and ethylene dependent defense and suppression of fungal virulence factors are major mechanisms  
667 of FHB resistance in wheat.

668 In the region B were found also following annotations:pseudo-response regulator 7  
669 (HORVU2Hr1G013400), 26S protease regulatory subunit 6B (HORVU2Hr1G014050,  
670 HORVU2Hr1G014060 and HORVU2Hr1G014080) and ubiquitin-activating enzyme 1  
671 (HORVU2Hr1G014440). All these annotations are linked to *HvPpd-H1*, which provides  
672 adaptation to photoperiod in barley. The barley Ppd-H1 gene is homologous to Arabidopsis  
673 PRR3/PRR7 and mediates the acceleration of development in long-days [113]. The Ppd-  
674 H1/PRR37 allele is the major determinant of photoperiod response in barley and is the putative

675 AtPRR7 orthologue [85]. Proteasomes are involved in the degradation of ubiquitin-tagged  
676 proteins. Alterations in proteasome subunits were found in several proteomic studies dealing with  
677 both abiotic and biotic stresses [114, 115].

678 Ubiquitin is well established as the major modifier of signaling in eukaryotes. The main  
679 characteristic of ubiquitination is the conjugation of ubiquitin onto lysine residues of acceptor  
680 proteins [116]. In most cases, the targeted protein is degraded by the 26S proteasome, the major  
681 proteolysis machinery in eukaryotic cells. The ubiquitin– proteasome system is responsible for  
682 removing most abnormal peptides and short-lived cellular regulators. This allows cells to respond  
683 rapidly to intracellular signals and changing environmental conditions. In our study, annotations  
684 linked to 26S protease regulatory subunits were found in region B (HORVU2Hr1G014050,  
685 HORVU2Hr1G014060, HORVU2Hr1G014080 and HORVU2Hr1G014770).

686

687

688 Conclusions

689

690 Results from the research conducted recently have revealed that most of the resistant barley  
691 genotypes showed QTL linked to FHB on the long arm of 2H chromosome, the first a coincident  
692 QTL for HD and the second associated with *vrs1* gene. In our study, two major QTLs (QFHB.IPG-  
693 2H\_1 and QFHB.IPG-2H\_2) found on chromosome 2H were located in the similar positions as  
694 the loci detected in previous studies (30, 86). A major confounding problem in mapping loci for  
695 FHB resistance is that QTLs for the agromorphological traits (HD, length of stem and spike type)  
696 are often coincident with the loci for disease resistance and they may interfere with resistance  
697 evaluation [82, 83]. Furthermore, it can be difficult to reveal the genetic architecture of these  
698 traits (linked QTL or pleiotropy) when many QTL are identified at the same locus. On the other  
699 hand, our results support a major assumption that plant architecture and inflorescence traits are  
700 associated significantly with FHB severity.



701 Out of six detected FHB QTLs in the current study, four were not classified as a loci  
702 localised in the hotspots, where many yield-related loci were detected. Although, in previously  
703 conducted studies QTLs associated with FHB were found on chromosomes 3H, 5H and 7H, QTLs  
704 identified in our investigation appear to be unique for FHB symptoms. Thus, the barley genotypes  
705 carrying these QTLs may be used in breeding programs without the confounding effects from  
706 another yield-related traits.

## 707 **Supporting Information**

708

709 S1 Table. The mean values for studied traits for parental cultivars.

710 (DOC)

711 S2 Table. The mean values for studied traits for RILs.

712 (DOC)

713 S3 Table . QTLs identified in the LCam population for the observed traits.

714 (DOC)

715

## 716 **Acknowledgments**

717

718 This work was financially supported by Polish Ministry of Agriculture and Rural Development  
719 (grant no HOR hn-501-19/15 Task 88).

720

## 721 **Author Contributions**

722 PO, AK, KM conception and design of the study; AK funding acquisition, project coordination;

723 PO, MK, MR, DJ plant breeding and stresses application; MK, PO, KM, AK sampling of plant material;

724 PK, HĆK methodology validation, statistics and computations; PO, AK, KM, MK, DJ samples preparation,

725 laboratory work and analyses; PO, AK, KM, TA, MS, PK data analysis and interpretation, manuscript

726 writing, revision and editing; PO, AK, KM, MK, TA, MS, PK, HĆK, MR and DJ contributed to the final

727 version of the manuscript.

728

729

## 730 **References**

731

732 1. Bottalico A, Perrone G. Toxigenic *Fusarium* species and mycotoxins associated with head  
733 blight in small-cereals in Europe. *Eur J Plant Pathol.* 2002;08: 611–624.

734 2. Shi W, Tan Y, Wang S, Gardiner MD, De Saeger S, Liao Y et al. Mycotoxigenic potentials of  
735 *Fusarium* species in various culture matrices revealed by mycotoxin profiling. *Toxins.* 2017; 9:  
736 6–21.

737 3. Berger G, Green A, Khatibi P, Brooks W, Rosso L, Liu S, et al. 2014. Characterization of  
738 *Fusarium* Head Blight Resistance and Deoxynivalenol Accumulation in Hulled and Hulless  
739 Winter Barley. *Plant Disease.* 2014;98: 599–606.

740 4. Zhu et al. 1999. Zhu H, Gilchrist L, Hayes P, Kleinhofs A, Kudrna D, Liu Z, et al. 1999. Does  
741 function follow form? Principal QTLs for *Fusarium* head blight (FHB) resistance are coincident



- 742 with QTLs for inflorescence traits and plant height in a doubled-haploid population of barley.  
743 Theor Appl Genet. 1999; 99:1221–1232.
- 744 5. European Food Safety Authority (EFSA). Risks to human and animal health related to the  
745 presence of deoxynivalenol and its acetylated and modified forms in food and feed. EFSA  
746 Journal. 2017;15: 4718.
- 747 6. Sobrova P, Adam V, Vasatkova A, Beklova M, Zeman L, Kizek R. 2010. Deoxynivalenol and  
748 its toxicity. Interdiscip Toxicol. 2010;3: 94–99.
- 749 7. Bernhoft A, Torp M, Clasen PE, Løes AK, Kristoffersen AB. Influence of agronomic and  
750 climatic factors on Fusarium infestation and mycotoxin contamination of cereals in Norway.  
751 Food Addit Contam A. 2012;29: 1129–1140.
- 752 8. Schöneberg T, Musa T, Forrer H-R, Mascher F, Bucheli TD, Bertossa M, et al. Infection  
753 conditions of Fusarium graminearum in barley are variety specific and different from those in  
754 wheat Eur J Plant Pathol. 2018;151: 975–989.
- 755 9. Wiśniewska H, Surma M, Krystkowiak K, Adamski T, Kuczyńska A, Ogrodowicz P, et al.  
756 Simultaneous selection for yield-related traits and susceptibility to Fusarium head blight in  
757 spring wheat RIL population. Breeding Sci. 2016;66: 281–292.
- 758 10. Alshannaq A, Yu JH. Occurrence, toxicity, and analysis of major mycotoxins in food. Int J  
759 Environ Res Public Health. 2017;p.632.
- 760 11. Levasseur-Garcia C. Updated Overview of Infrared Spectroscopy Methods for Detecting  
761 Mycotoxins on Cereals (Corn, Wheat, and Barley). Toxins. 2018;10: 3.
- 762 12. Ji F, Li H, Xu JH, Shi JR. Enzyme-linked immunosorbent-assay for deoxynivalenol (DON).  
763 Toxins. 2011;3: 968–978. doi: 10.3390/toxins3080968.
- 764 13. Eslami M, Mashak Z, Heshmati A, Shokrzadeh M, Sasan A, Nejad M. Determination of  
765 aflatoxin B1 levels in Iranian rice by ELISA method. Toxin Rev. 2015;34: 125–128. doi:  
766 10.3109/15569543.2015.1074925.
- 767 14. Cai X, Xu S, Oliver R, Zhang Q, Stack R, Zhong S, et al. Alien introgression for FHB resistance  
768 in wheat – challenges and strategies. In: Appels R, Eastwood R, Lagudah E, Langridge P,  
769 Mackay M, McIntyre L, Sharp P, editors. Proceedings of the 11<sup>th</sup> International Wheat Genet  
770 Symposium; Aug 24–29; Brisbane, Qld, Australia: Sydney Univ Press, Sydney (Australia);  
771 2008.
- 772 15. Buerstmayr M, Huber K, Heckmann J, Steiner B, Nelson J, Buerstmayr H. Mapping of QTL for  
773 Fusarium head blight resistance and morphological and developmental traits in three backcross  
774 populations derived from *Triticum dicoccum* × *Triticum durum*. Theor Appl Genet. 2012;125:  
775 1751–1765. doi: 10.1007/s00122-012-1951-2.
- 776 16. Schulte D, Close TJ, Graner A, Langridge P, Matsumoto T, Muehlbauer G, et al. The  
777 international barley sequencing consortium—at the threshold of efficient access to the barley  
778 genome. Plant Physiol. 2009;149: 142–147.
- 779 17. Hunt CW. Factors affecting the feeding quality of barley for ruminants. Anim Feed Sci Technol.  
780 1996;62: 37–48.
- 781 18. Ullrich SE, Han F, Froseth JA, Jones BL, Newman CW, Wesenberg DM. Mapping of loci  
782 affect carbohydrate content in barley grain. In: Proceedings of V International Oat Conference  
783 & VII Bar-ley Genetic Symposium, Saskatoon; 30 July – 6 August 1993. pp.141–143.
- 784 19. Saisho D, Takeda K. Barley: emergence as a new research material of crop science. Plant Cell  
785 Physiol. 2011;52(5): 724–727.
- 786 20. Savi, GD, Piacentini KC, Tibola C, Scussel VM. (2014). Mycoflora and deoxynivalenol in  
787 whole wheat grains (*Triticum aestivum*) from Southern Brazil. Food Addit Contam Part B  
788 Surveill. 2014;7(3): 232–7. doi: 10.1080/19393210.2014.898337.
- 789 21. Steffenson BJ. “Fusarium head blight of barley: impact, epidemics, management, and strategies  
790 for identifying and utilizing genetic resistance,” in Fusarium Head Blight of Wheat and Barley,  
791 eds Leonard K. J., Bushnell W. R., editors. (Saint Paul, MN: The American Phytopathological  
792 Society); 2003. 241–295.

- 793 22. de la Pena KP, Smith F, Capettini GJ, Muehlbauer M, Gallo-Meagher R, et al. Quantitative trait  
794 loci associated with resistance to Fusarium head blight and kernel discoloration in barley *Theor*  
795 *Appl Genet.* 1999;99: 561–569.
- 796 23. Ma ZQ, Zhao DM, Zhang CQ, Zhang ZZ, Xue SL, Lin F, Kong ZX, Tian DG, Luo  
797 QY. Molecular genetic analysis of five spike-related traits in wheat using RIL and  
798 immortalized F-2 populations. *Mol. Genet. Genomics.* 2007;277(1): 31–42.
- 799 24. Mesfin A, Smith KP, Dill-Macky R, Evans CK, Waugh R, Gustus CD, et al. Quantitative trait  
800 loci for Fusarium head blight resistance in barley detected in a two-rowed by six-rowed  
801 population. *Crop Sci.* 2003;43: 307–318. doi: 10.2135/cropsci2003.3070.
- 802 25. Geddes J, Eudes F, Laroche A, Selinger LB. Differential expression of proteins in response to  
803 the interaction between the pathogen *Fusarium graminearum* and its host, *Hordeum vulgare*.  
804 *Proteomics.* 2008;8: 545–554.
- 805 26. Mesterhazy A. Types and components of resistance to Fusarium head blight of wheat. *Plant*  
806 *Breed.* 1995;114: 377–386. doi: 10.1111/j.1439-0523.1995.tb00816.x.
- 807 27. Bai G, Shaner G. Scab of wheat: prospects for control. *Plant Dis.* 1994;78: 760–766.
- 808 28. Zhao L, Ma X, Su P, Ge W, Wu H, Guo X, et al. Cloning and characterization of a specific  
809 UDP-glycosyltransferase gene induced by DON and *Fusarium graminearum*. *Plant Cell Rep.*  
810 2018; 37(4): 641–652. doi: 10.1007/s00299-018-2257-x.
- 811 29. Yu JB, Bai GH, Zhou WC, Dong YH, Kolb FL. Quantitative trait loci for Fusarium head blight  
812 resistance in a recombinant inbred population of Wangshuibai/Wheaton. *Phytopathology.*  
813 2008;98: 87–94.
- 814 30. Dahleen LS, Morgan W, Mittal S, Bregitzer P, Brown RH, Hill NS. Quantitative trait loci  
815 (QTL) for Fusarium ELISA compared to QTL for Fusarium head blight resistance and  
816 deoxyniva-lenol content in barley. *Plant Breed.* 2012;131: 237–243. doi:10.1111/j.1439-  
817 0523.2012.01952.x.
- 818 31. Dahleen L, H. Agrama H, R. Horsley R, B. Steffenson B, P. Schwarz P, A. Mesfin A, et al.  
819 Identification of QTLs associated with Fusarium head blight resistance in Zhedar 2 barley.  
820 *Theor Appl Genet.* 2003;108: 95–104. doi:10.1007/s00122-003-1409-7.
- 821 32. Buerstmayr M, Lemmens M, Steiner B, Buerstmayr H. Advanced backcross QTL mapping of  
822 resistance to Fusarium head blight and plant morphological traits in a *Triticum macha* × *T.*  
823 *aestivum* population. *Theor Appl Genet.* 2011;123: 293–306. doi: 10.1007/s00122-011-1584-x.
- 824 33. Mao S, Wei Y, Cao W, Lan X, Yu M. Confirmation of the relationship between plant height  
825 and Fusarium head blight resistance in wheat (*Triticum aestivum* L.) by QTL meta-analysis.  
826 *Euphytica.* 2010;174: 343–356. doi: 10.1007/s10681-010-0128-9.
- 827 34. Rostoks N, Ramsay L, MacKenzie K, Cardle L, Bhat PR, Roose ML, et al. (2006) Recent  
828 history of artificial outcrossing facilitates whole-genome association mapping in elite inbred  
829 crop varieties. *Proc Natl Acad Sci.* 2006;103(49): 18656–1866.  
830 doi.org/10.1073/pnas.0606133103.
- 831 35. Waugh R, Jannink JL, Muehlbauer GJ, Ramsay L. The emergence of whole genome  
832 association scans in barley. *Curr Opin Plant Biol.* 2009;12: 218–222.
- 833 36. Comadran J, Kilian B, Russell J, Ramsay L, Stein N, Ganal M, et al. Natural variation in a  
834 homolog of *Antirrhinum CENTRORADIALIS* contributed to spring growth habit and  
835 environmental adaptation in cultivated barley. *Nat Genet.* 2012;44: 1388–1392. doi:  
836 10.1038/ng.2447.
- 837 37. Ogrodowicz P, Adamski T, Mikołajczak K, Kuczyńska A, Surma M, Krajewski P, et al. QTLs  
838 for earliness and yield-forming traits in the Lubuski × CamB barley RIL population under  
839 various water regimes. *J Appl Genet.* 2017;58: 49–65. doi: 10.1007/s13353-016-0363-4.
- 840 38. Mikołajczak K, Ogrodowicz P, Gudyś K, Krystkowiak K, Sawikowska A, Frohmberg W, et al.  
841 Quantitative trait loci for yield and yield-related traits in spring barley populations derived from  
842 crosses between European and Syrian cultivars. *PLoS ONE.* 2016;11(5): e0155938. doi:  
843 10.1371/journal.pone.0155938.

- 844 39. Close TJ, Bhat PR, Lonardi S, Wu Y, Rostoks N, Ramsay L, et al. Development and  
845 implementation of high-throughput SNP genotyping in barley. *BMC Genomics*. 2009;10: 582.  
846 doi: 10.1186/1471-2164-10-582.
- 847 40. Muñoz-Amatriaín M, Moscou MJ, Bhat PR, Svensson JT, Bartoš J, Suchánková P et al. An  
848 improved consensus linkage map of barley based on flow-sorted chromosomes and single  
849 nucleotide polymorphism markers. *Plant Genome*. 2011;4: 238–249.
- 850 41. Bayer MM, Rapazote-Flores P, Ganal M, Hedley PE, Macaulay M, Plieske J, et al. Development  
851 and evaluation of a barley 50k iSelect SNP array. *Front Plant Sci*. 2017;8: 1792. doi:  
852 10.3389/fpls.2017.01792
- 853 42. Van Ooijen J. JoinMap 4. Software for the calculation of genetic linkage maps in experimental  
854 populations. Wageningen: Kyazma BV; 2006.
- 855 43. Malosetti M, Ribaut J-M, van Eeuwijk FA. The statistical analysis of multi-environment data:  
856 modeling genotype-by-environment interaction and its genetic basis. *Front Physiol*. 2013;4: 44.  
857 doi: 10.3389/fphys.2013.00044.
- 858 44. Li J, Ji L. Adjusting multiple testing in multilocus analyses using the eigenvalues of a correlation  
859 matrix. *Heredity*. 2005;95: 221–227. doi: 10.1038/sj.hdy.6800717.
- 860 45. VSN International. GenStat for Windows 16th Edition VSN International. Hemel Hempstead;  
861 2013.
- 862 46. Rant JC, Arraiano LS, Chabannes M, Brown JKM. Quantitative trait loci for partial resistance  
863 to *Pseudomonas syringae* pv. *maculicola* in *Arabidopsis thaliana*. *Mol Plant Pathol*. 2013;14:  
864 828–837. doi: 10.1111/mpp.12043.
- 865 47. Dhariwal R, Fedak G, Dion Y, Pozniak C, Laroche A, Eudes F, et al. High density single  
866 nucleotide polymorphism (SNP) mapping and quantitative trait loci (QTL) analysis in a  
867 biparental spring triticale population localized major and minor effect *Fusarium* head blight  
868 resistance and associated traits QTL. *Genes (Basel)*. 2018;9(1).
- 869 48. Saxena RK, Kale SM, Kumar V, Parupalli S, Joshi S, Singh VK, et al. Genotyping-by-  
870 sequencing of three mapping populations for identification of candidate genomic regions for  
871 resistance to sterility mosaic disease in pigeonpea. *Sci Rep*. 2017;7: 1813.
- 872 49. Gahlaut V, Jaiswal V, Tyagi BS, Singh G, Sareen S, Balyan HS, et al. (2017)QTL mapping for  
873 nine drought-responsive agronomic traits in bread wheat under irrigated and rainfed  
874 environments. *PLoS ONE* 12(8):e0182857. doi.org/10.1371/journal.pone.0182857.
- 875 50. Cantalapiedra CP, Boudiar R, Casas MA, Igartua E, Contreras-Moreira B. BARLEYMAP:  
876 physical and genetic mapping of nucleotide sequences and annotation of surrounding loci in  
877 barley. *Mol Breed*. 2015;35: 13.
- 878 51. Lee JA, Sinkovits RS, Mock D, Rab EL, Cai J, Yang P et al. Components of the antigen  
879 processing and presentation pathway revealed by gene expression microarray analysis following  
880 B cell antigen receptor (BCR) stimulation. *BMC Bioinformatics*. 2006;2(7): 237.
- 881 52. Luo F, Yang Y, Chen CF, Chang R, Zhou J, Scheuermann RH, et al. Modular organization of  
882 protein Interaction networks. *Bioinformatics*. 2007;23: 207–214.
- 883 53. Benjamini Y, Hochberg Y. Controlling the false discovery rate: a practical and powerful  
884 approach to multiple hypothesis testing. *J R Stat Soc*. 1995;57: 289–300.
- 885 54. Surma M, Adamski T, Wiśniewska H, Kaczmarek Z, Mejza I, Mejza S, et al. Uni-and  
886 multivariate approaches to evaluating the susceptibility of wheat hybrids to *Fusarium* head  
887 blight. *Czech J Genet Plant Breed*. 2016;52: 132–138.
- 888 55. Shah L, Ali A, Yahya M, Zhu Y, Wang S, Si H, et al. Integrated control of *Fusarium* head blight  
889 and deoxynivalenol mycotoxin in wheat. *Plant Pathol*. 2018;67(3): 532–548.
- 890 56. Xue AG, Ho KM, Butler G, Vigier BJ, Babcock C. Pathogenicity of *Fusarium* species causing  
891 head blight in barley. *Phytoprotection*. 2006;87: 55–61.
- 892 57. Tekauz A, McCallum B, Gilbert J. Review: *Fusarium* head blight of barley in western Canada.  
893 *Can J Plant Pathol*. 2000;22: 9–16.

- 894 58. Zhang JX, Jin Y, Rudd JC, Bockelman HE. New Fusarium head blight resistant spring wheat  
895 germplasm identified in the USDA National Small Grains Collection. *Crop Sci.* 2008; 48 (1):  
896 223–235.
- 897 59. Parry DW, Jenkinson P, McLeod L. Fusarium ear blight(scab) in small-grain cereals—a review.  
898 *Plant Pathol.* 1995;44: 207–238.
- 899 60. Rudd JC, Horsley RD, McKendry AL, Elias EM. Host plantresistance genes for Fusarium head  
900 blight: sources, mechanisms, and utility in conventional breeding systems. *Crop Sci.* 2001;41:  
901 620–627.
- 902 61. Huang Y, Haas M, Heinen S, Steffenson BJ, Smith KP, Muehlbauer GJ. QTL mapping of  
903 fusarium head blight and correlated agromorphological traits in an elite barley cultivar  
904 Rasmusson. *Front Plant Sci.* 2018;9: 1260. doi: 10.3389/fpls.2018.01260.
- 905 62. Yoshida M, Kawada N, Nakajima T. Effect of infection timing on Fusarium head blight and  
906 mycotoxin accumulation in open- and closed-flowering barley. *Phytopathology.* 2007;97:  
907 1054–1062.
- 908 63. Paul PA, Lipps PE, Madden LV. 2005. Relationship between visual estimates of Fusarium  
909 head blight intensity and deoxynivalenol accumulation in harvested wheat grain: A meta-  
910 analysis. *Phytopathology.* 2005;95: 1225–1236.
- 911 64. Champeil A, Dore T, Fourbet JF. Fusarium head blight: epidemiological origin of the effects of  
912 cultural practices on head blight attacks and the production of mycotoxins by Fusarium in wheat  
913 grains. *Plant Sci.* 2004;166: 1389–1415.
- 914 65. Turner NW, Subrahmanyam S, Piletsky S. Analytical methods for determination of mycotoxins:  
915 a review. *Anal Chim Acta.* 2009;632: 168–180.
- 916 66. Pereira VL, Fernandes JO, Cunha SC. (2014) Mycotoxins in cereals and related foodstuffs: A  
917 review on occurrence and recent methods of analysis. *Trends Food Sci Technol.* 2014;36(2):  
918 96–136.
- 919 67. Hill NS, Neate SM, Cooper B, Horsley R, Schwarz P, Dahleen LS, et al. 2008. Comparison of  
920 ELISA for Fusarium, visual screening, and deoxynivalenol analysis of Fusarium head blight  
921 for barley field nurseries. *Crop Sci.* 2008;48: 1389–1398.
- 922 68. Nita M, Tilley K, De Wolf E, Kuldau G. Effects of Moistureduring and after anthesis on the  
923 development of Fusarium head blight of wheat and mycotoxins production. In: Canty, S.M.,  
924 Lewis, J., Siler,L. and Ward, R.W. (Eds.). In: Proceedings of the 2005 National Fusarium Head  
925 Blight Forum, HiltonMilwaukee City Center, Milwaukee, Wisconsin, USA; 2005. pp. 125–  
926 128.
- 927 69. Omori AM, Ono EYS, Hirozawa MT, de Souza Sugiura IM, Hirooka EY, Pelegrinelli Fungaro  
928 MH, et al. Development of Indirect Competitive Enzyme-Linked Immunosorbent Assay to  
929 Detect Fusarium verticillioides in Poultry Feed Samples. *Toxins.* 2019;11(1): E48. doi:  
930 10.3390/toxins11010048.
- 931 70. Steffenson BJ, Prom LK, Salas B, Fetch TG, Wesenberg DM, Bockelman HE. “Severity of  
932 Fusarium head blight and concentrations of deoxynivalenol in near isogenic lines of barley  
933 differing for several agronomic characters,” in Proceedings of the 7th International Barley  
934 Genetics Symposium, eds Slinkard A., Scoles G., Rossnagel B., editors. (Saskatoon: University  
935 Extension Press); 1996.
- 936 71. Urrea CA, Horsley RD, Steffenson BJ. Heritability of Fusarium head blight resistance and  
937 deoxynivalenol accumulation from barley accession. *Crop Sci.* 2002;42: 1404–1408.
- 938 72. Yoshida M, Kawada N, Tohnooka T. (2005) Effect of row type, flowering type and several  
939 other spike characters on resistance to Fusarium head blight in barley. *Euphytica.* 2005;141:  
940 217–227.
- 941 73. Ma Z, Steffenson BJ, Prom LK, Lapitan NL. Mapping of quantitative trait loci for Fusarium head  
942 blight resistance in barley. *Phytopathology.* 2000; 90(10): 1079–1088.



- 943 74. McCartney CA, Brûlé-Babel AL, Fedak G, Martin RA, Mccallum BD, Gilbert J, et al. (2016).  
944 Fusarium head blight resistance QTL in the spring wheat cross Kenyon/86ISMN 2137. *Front*  
945 *Microbiol.* 2016;7: 1542. doi: 10.3389/fmicb.2016.01542.
- 946 75. Cui F, Zhang N, Fan XL, Zhang W, Zhao CH, Yang LJ, et al. (2017). Utilization of a  
947 Wheat660K SNP array-derived high-density genetic map for high-resolution mapping of a  
948 major QTL for kernel number. *Sci Rep.* 2017;7: 3788. doi: 10.1038/s41598-017-04028-6.
- 949 76. Mansour E, Casas AM, Gracia AP, Molina-Cano JL, Moralejo M, Cattivelli L, et al.  
950 Quantitative trait loci for agronomic traits in an elite barley population for Mediterranean  
951 conditions. *Mol Breed.* 2014;33: 249–265.
- 952 77. Wang N, Chen B, Xu K, Gao G, Li F, Qiao J, et al. Association mapping of flowering time  
953 QTLs and insight into their contributions to rapeseed growth habits. *Front Plant Sci.* 2016;7:  
954 338. doi: 10.3389/fpls.2016.00338.
- 955 78. Hori K, Kobayashi T, Sato K, Takeda K. QTL analysis of Fusarium head blight resistance using  
956 a high-density linkage map in barley. *Theor Appl Genet.* 2005;111: 1661–1672. doi:  
957 10.1007/s00122-005-0102-4.
- 958 79. Horsley RD, Schmierer D, Maier C, Kudrna D, Urrea CA, Steffenson BJ, et al. Identification of  
959 QTLs associated with Fusarium head blight resistance in barley accession CIho 4196. *Crop Sci.*  
960 2006;46: 145–156. doi: 10.2135/cropsci2005.0247.
- 961 80. Massman J, Cooper B, Horsley R, Neate S, Dill-Macky R, Chao S, et al. Genome-wide  
962 association mapping of Fusarium head blight resistance in contemporary barley breeding  
963 germplasm. *Mol Breed.* 2011;27: 439–454. doi: 0.1007/s11032-010-9442-0.
- 964 81. Huang Y, Haas M, Heinen S, Steffenson BJ, Smith KP, Muehlbauer GJ. QTL mapping of  
965 fusarium head blight and correlated agromorphological traits in an elite barley cultivar  
966 Rasmusson. *Front Plant Sci.* 2018;9: 1260. doi: 10.3389/fpls.2018.01260.
- 967 82. Mamo BE, Steffenson BJ. Genome-wide association mapping of Fusarium head blight  
968 resistance and agromorphological traits in barley landraces from Ethiopia and Eritrea. *Crop Sci.*  
969 2015; 55: 1494–1512. doi: 10.2135/cropsci2014.06.0428.
- 970 83. Miedaner T, Heinrich N, Schneider B, Oettler G, Rohde S, Rabenstein F. Estimation of de-  
971 oxynivalenol (DON) content by symptom rating and exoantigen content for resistance selection  
972 in wheat and triticale. *Euphytica.* 2004;139: 123–132.
- 973 84. Šliková S, Šudyová V, Martinek P, Polišínská I, Gregová E, Mihálik D. Assessment of infection  
974 in wheat by Fusarium protein equivalent levels. *Eur J Plant Pathol.* 2009;124: 163–170.
- 975 85. Turner A, Beales J, Faure S, Dunford RP, Laurie DA. The pseudo-response regulator Ppd-H1  
976 provides adaptation to photoperiod in barley. *Science.* 2005;310: 1031–1034.
- 977 86. Huang Y, Li L, Smith KP, Muehlbauer GJ. (2016). Differential transcriptomic responses to  
978 Fusarium graminearum infection in two barley quantitative trait loci associated with Fusarium  
979 head blight resistance. *BMC Genomics.* 2016;17: 387. doi: 10.1186/s12864-016-2716-0.
- 980 87. Nduulu L, Mesfin A, Muehlbauer G, Smith K. Analysis of the chromosome 2(2H) region of  
981 barley associated with the correlated traits Fusarium head blight resistance and heading date.  
982 *Theor Appl Genet.* 2007;115: 561–570. doi: 10.1007/s00122-007-0590-5.
- 983 88. He X, Osman M, Helm J, Capettini F, Singh PK. Evaluation of Canadian barley breeding lines  
984 for Fusarium head blight resistance. *Can J Plant Sci.* 2015;95: 923–929.
- 985 89. Robertson A. The nature of quantitative genetic variation. In *Heritage from Mendel* (ed. Brink  
986 A., editor. ), Madison, WI: The University of Wisconsin Press; 1967. pp. 265–280.
- 987 90. Kuczyńska A, Mikołajczak K, Cwiek H. Pleiotropic effects of the *sdw1* locus in barley  
988 populations representing different rounds of recombination. *Electron J Biotechnol.* 2014;  
989 17(5):217–223.
- 990 91. Wang J, Yang J, Jia Q, Zhu J, Shang Y, Hua W. et al. A new QTL for plant height in barley  
991 (*Hordeum vulgare* L.) showing no negative effects on grain yield. *PLoS ONE.* 2014;9:e90144.  
992 doi: 10.1371/journal.pone.0090144.

- 993 92. Kuczyńska A, Surma M, Adamski T, Mikołajczak K, Krystkowiak K, Ogrodowicz P. Effects  
994 of the semi-dwarfing *sdw1/denso* gene in barley. *J Appl Genet.* 2013;54: 381–390.
- 995 93. Surma M, Kuczyńska A, Mikołajczak K, Ogrodowicz P, Adamski T, Ćwiek-Kupczyńska H, et  
996 al. Barley varieties in semi-controlled and natural conditions - response to water shortage and  
997 changing environmental parameters. *J Agron Crop Sci.* 2018;205(3).
- 998 94. Nakajima M, Shimada A, Takashi Y, Kim YC, Park SH, Ueguchi-Tanaka M, et al.(2006).  
999 Identification and characterization of *Arabidopsis* gibberellin receptors. *The Plant J.* 2006;46:  
1000 880–889.
- 1001 95. Mikołajczak K, Kuczynska A, Krajewski P, Sawikowska A, Surma M, Ogrodowicz P, et al.  
1002 Quantitative trait loci for plant height in Maresi × CamB barley population and their associations  
1003 with yield-related traits under different water regimes. *J Appl Genet.* 2017;58: 23–35.
- 1004 96. Paul PA, El-Allaf SM, Lipps PE, Madden LV. Rain splash dispersal of *Gibberella zeae* within  
1005 wheat canopies in Ohio. *Phytopathology.* 2004;94: 1342–1349. doi:  
1006 10.1094/PHYTO.2004.94.12.1342.
- 1007 97. Nadolska-Orczyk A, Rajchel IK, Orczyk W, Gasparis S. Major genes determining yield-related  
1008 traits in wheat and barley. *Theor Appl Genet.* 2017;130(6): 1081–98. WOS:000401980500001.  
1009 pmid:28314933.
- 1010 98. Choo TM, Vigier B, Shen QQ, Martin RA, Ho KM, Savard M. Barley traits associated with  
1011 resistance to fusarium head blight and deoxynivalenol accumulation. *Phytopathology.* 2004;94:  
1012 1145–1150.
- 1013 99. Langevin F, Eudes F, Comeau A. 2004. Effect of trichothecenes produced by *Fusarium*  
1014 *graminearum* during *Fusarium* head blight development in six cereal species. *Eur J Plant Pathol.*  
1015 2004;110: 735–746.
- 1016 100. Li XX, Zhu B, Gao XW, Liang P. Over-expression of UDP-glycosyltransferase gene  
1017 *UGT2B17* is involved in chlorantraniliprole resistance in *Plutella xylostella* (L.) *Pest Manag*  
1018 *Sci.* 2017;73: 1402–1409.
- 1019 101. Xing Z, Geng W, Li C, Sun Y, Wang Y. (2017). Comparative genomics of *Lactobacillus*  
1020 *kefiranofaciens* ZW3 and related members of *Lactobacillus* spp reveal adaptations to dairy and  
1021 gut environments. *Sci Rep.* 2017;7: 12827. doi: 10.1038/s41598-017-12916-0.
- 1022 102. Gachon CM, Langlois-Meurinne M, Saindrenan P. Plant secondary metabolism  
1023 glycosyltransferases: the emerging functional analysis. *Trends Plant Sci.* 2005;10(11): 542–549.
- 1024 103. Caputi L, Malnoy M, Goremykin V, Nikiforova S, Martens S. A genome-wide phylogenetic  
1025 reconstruction of family 1 UDP-glycosyltransferases revealed the expansion of the family  
1026 during the adaptation of plants to life on land. *Plant J.* 2012;69: 1030–1042.
- 1027 104. Poppenberger B, Berthiller F, Lucyshyn D, Sieberer T, Schuhmacher R, Krska R, et al.  
1028 Detoxification of the *Fusarium* mycotoxin deoxynivalenol by a UDP-glucosyltransferase from  
1029 *Arabidopsis thaliana*. *J Biol Chem.* 2003;278: 47905–47914.
- 1030 105. Van Loon LC, Van Strien EA. The families of pathogenesis-related proteins, their activities,  
1031 and comparative analysis of PR-1 type proteins. *Physiol Mol Plant Pathol.* 1999;55: 85–97.
- 1032 106. Pritsch C, Muehlbauer GJ, Bushnell WR, Somers DA, Vance CP. Fungal development and  
1033 induction of defense response genes during early infection of wheat spikes by *Fusarium*  
1034 *graminearum*. *Mol Plant Microbe Interact.* 2000;13: 159–169.
- 1035 107. Balasubramanian V, Vashisht D, Cletus J, Sakthivel N. Plant  $\beta$ -1,3-glucanases: Their  
1036 biological functions and transgenic expression against phytopathogenic fungi. *Biotechnol Lett.*  
1037 2012;34(11):1983–90. doi: 10.1007/s10529-012-1012-6.
- 1038 108. Robert-Seilantantz A, Navarro L, Bari R, Jones JD. Pathological hormone imbalances *Curr.*  
1039 *Opin. Plant Biol.* 2007;10: 372–379.
- 1040 109. Petti C, Reiber K, Ali SS, Berney M, Doohan FM. Auxin as a player in the biocontrol of  
1041 *Fusarium* head blight disease of barley and its potential as a disease control agent. *BMC Plant*  
1042 *Biol.* 2012;12: 224. doi: 10.1186/1471-2229-12-224.

- 1043 110. Denancé N, Sánchez-Vallet A, Goffner D, Molina A. 2013. Disease resistance or growth: the  
1044 role of plant hormones in balancing immune responses and fitness costs. *Front Plant Sci.* 2013;4:  
1045 155.
- 1046 111. Wang K, Guo Q, Froehlich JE, Hersh HL, Zienkiewicz A, Howe GA, Benning C. Two  
1047 Abscisic Acid-Responsive Plastid Lipase Genes Involved in Jasmonic Acid Biosynthesis in  
1048 *Arabidopsis thaliana*. *The Plant Cell.* 2018;30(5): 1006-1022. doi: 10.1105/tpc.18.00250.
- 1049 112. Gottwald S, Samans B, Lück S, Friedt W. Jasmonate and ethylene dependent defence gene  
1050 expression and suppression of fungal virulence factors: Two essential mechanisms of *Fusarium*  
1051 head blight resistance in wheat? *BMC Genomics.* 2012;13: 369.
- 1052 113. Ford B, Deng W, Clausen J, Oliver S, Boden S, Hemming M, et al. Barley (*Hordeum vulgare*)  
1053 circadian clock genes can respond rapidly to temperature in an EARLY FLOWERING 3-  
1054 dependent manner. *J Exp Bot.* 2016; 67(18):5517–5528. doi: 10.1093/jxb/erw317.
- 1055 114. Fercha A, Capriotti AL, Caruso G, Cavaliere C, Gherroucha H, Samperi R, et al. Gel-free  
1056 proteomics reveal potential biomarkers of priming-induced salt tolerance in durum wheat. *J*  
1057 *Proteomics.* 2013;91: 486–499. doi: 10.1016/j.jprot.2013.08.010.
- 1058 115. Ghabooli M, Khatabi B, Ahmadi FS, Sepehri M, Mizraei M, Amirkhani A, et al. Proteomics  
1059 study reveals the molecular mechanisms underlying water stress tolerance induced by  
1060 *Piriformospora indica* in barley. *J Proteomics.* 2013;94:289–301. doi:  
1061 10.1016/j.jprot.2013.09.017
- 1062 116. Stone SL, Callis J. Ubiquitin ligases mediate growth and development by promoting protein  
1063 death. *Curr Opin Plant Biol.* 2007;10: 624–632. doi: 10.1016/j.pbi.2007.07.010.  
1064
- 1065
- 1066
- 1067
- 1068
- 1069
- 1070
- 1071
- 1072
- 1073

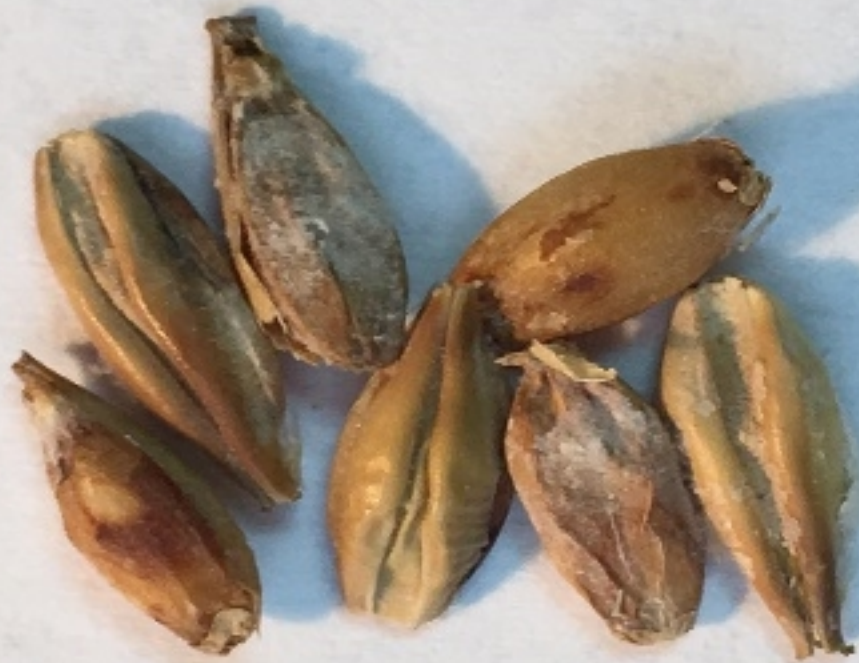

Figure 1



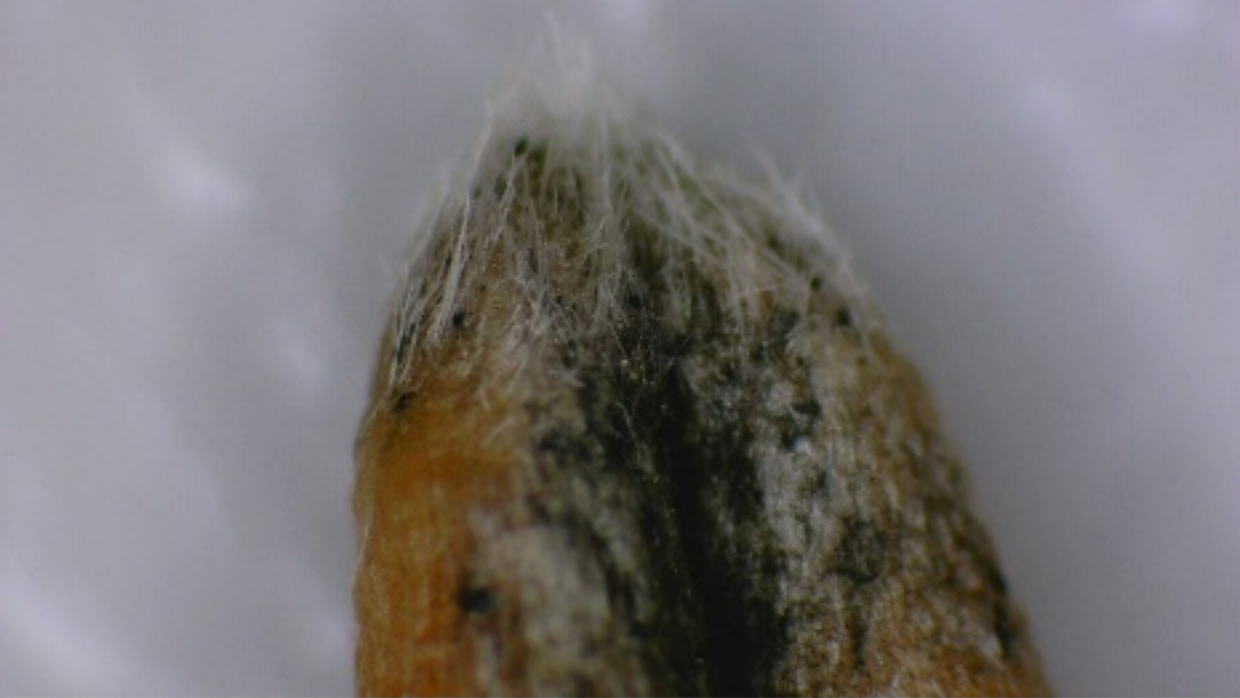

Figure2

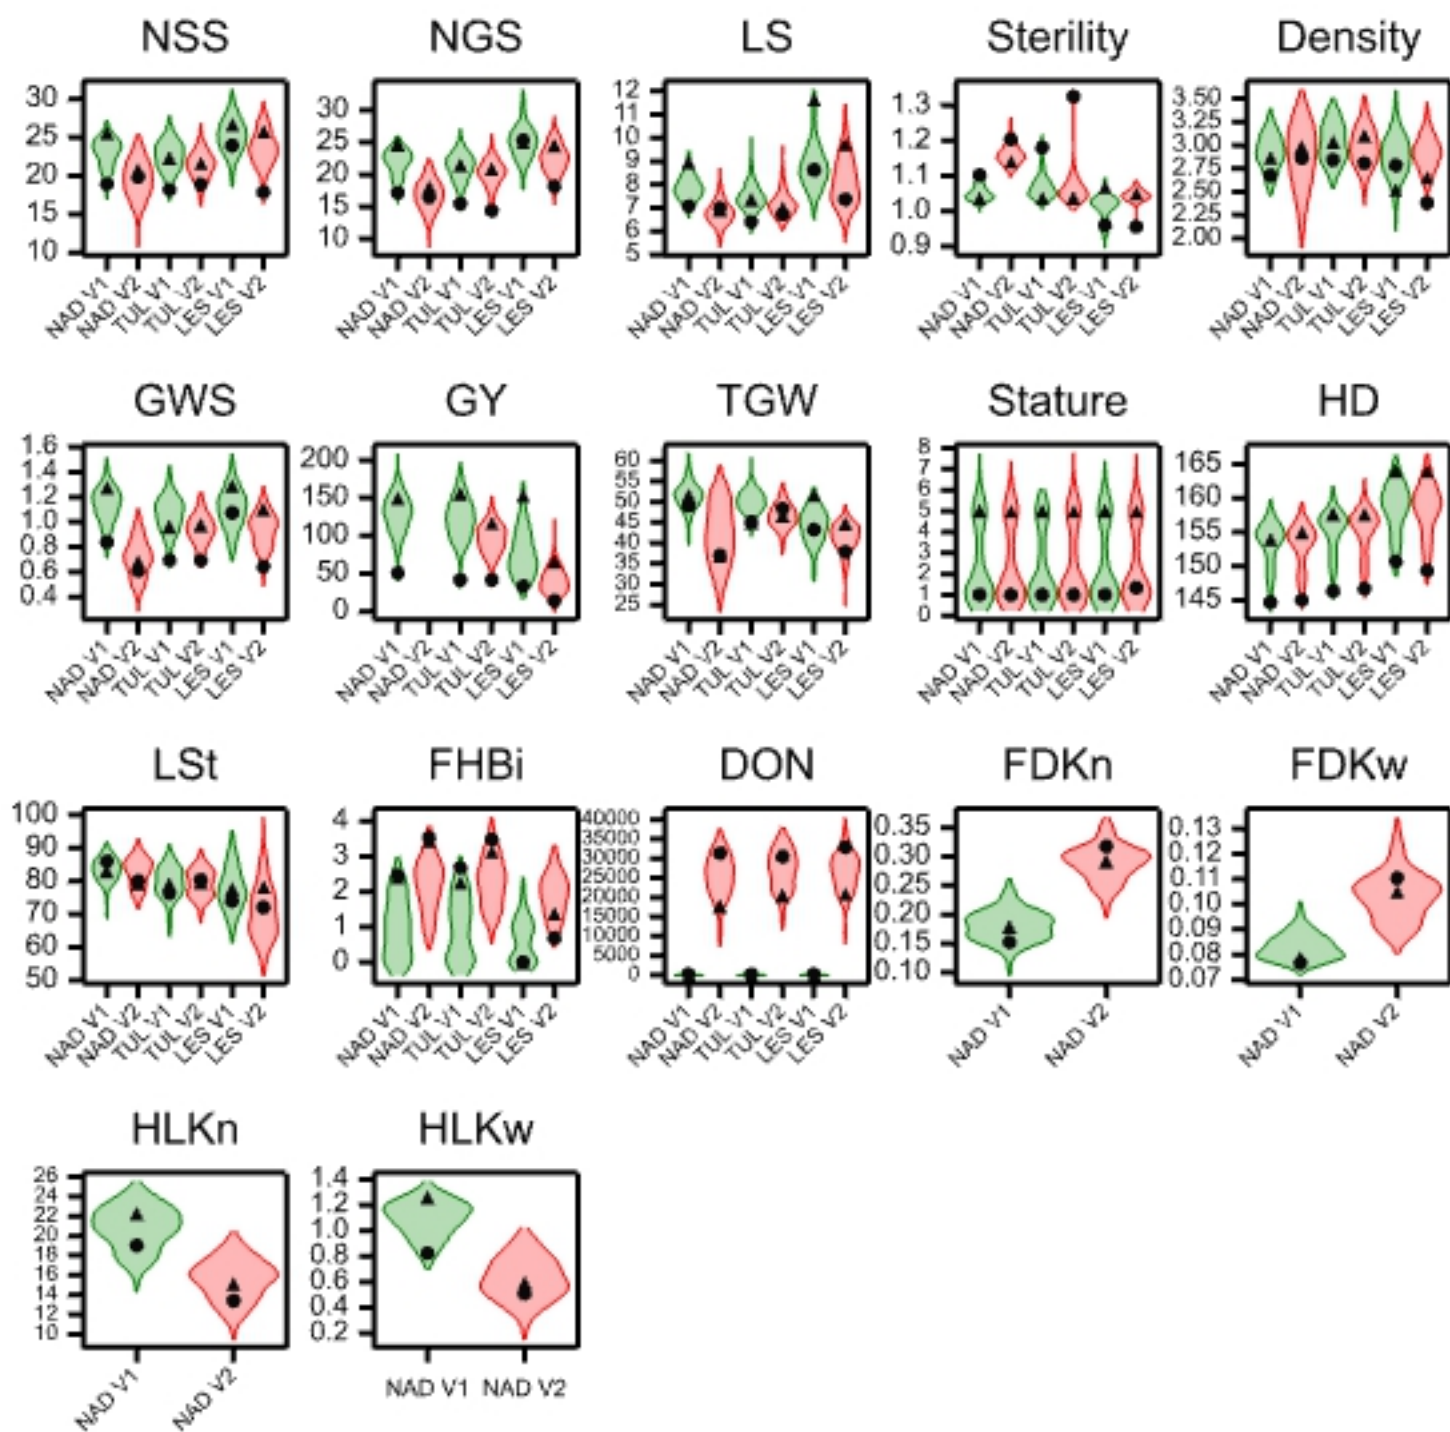

Figure3

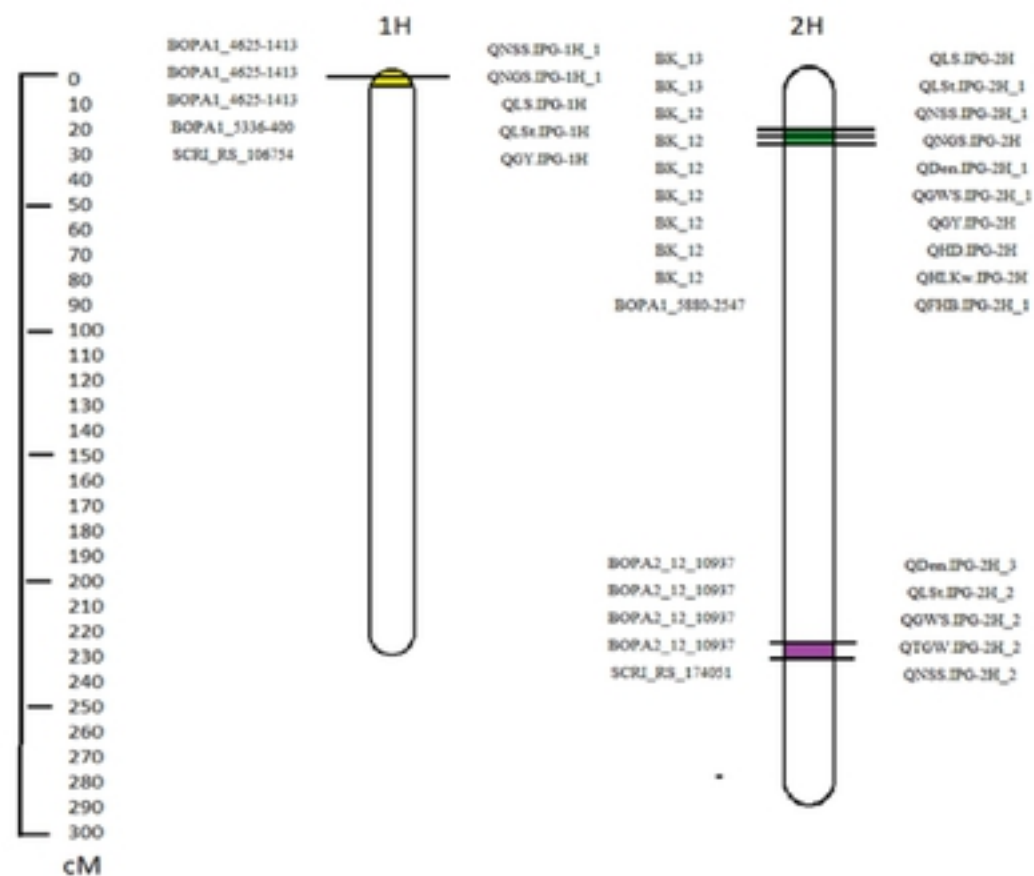

Figure4
